# Supplementary material for: Multiple Genetic Loci for Bone Mineral Density and Fractures
Source: Atypon-hosted journal article supplement (doi:10.1056/nejmoa0801197), 2008-04-29
Supplement: nejmoa0801197-sa1.pdf [file nejmoa0801197-sa1.pdf]

# Supplementary Appendix 1

This appendix has been provided by the authors to give readers additional information about their work.

Supplement to: Styrkarsdottir U, Halldorsson BV, Gretarsdottir S, et al. Multiple genetic loci for bone mineral density and fractures. *N Engl J Med* 2008;358:2355-65. DOI: 10.1056/NEJMoa0801197.

## **SUPPORTING APPENDIX ONLINE MATERIAL**

### **Methods**

#### **Study populations**

The Icelandic discovery sample set comprised 5,085 women and 776 men who had dual-energy X-ray absorptiometry (DEXA, Hologic QDR4500A) BMD measurements at the lumbar spine (L2-L4) and the hip (combined values at the femoral neck, trochanter and intertrochanter region). There were 5,715 (4,951 women) with hip measurement and 5,858 (5,083 women) with spine measurement. Of this group, 1,200 women had been selected for IlluminaHap300K genotyping because of their low BMD ( $< -1.2$  SD of age and weight corrected BMD) as a part of our osteoporosis genetic program. All others were genotyped on Illumina Hap300k through other disease projects. The Icelandic replication group comprised 3,189 women and 983 men. Information on diseases that influence BMD or medications that have an effect on BMD (e.g. Hormone Replacement Therapy or Corticosteroids use) was only available for 2,500 of the original discovery individuals and for 1,800 of the replication samples. The rs9594738 HapMap SNP didn't have any data in the discovery sample set and was subsequently genotyped in 2099 individuals in the discovery set, in addition to the Icelandic replication sample set. Osteoporotic fractures were defined as low impact fractures, self-reported. Fractures of fingers, hands, toes, or feet were not included. Hip fracture cases were from individuals undergoing femoral neck fractures surgery at Reykjavik's University Hospital or the General Hospital, Akureyri. Of the hip fracture cases used in this study (n=1087) only 308 (28%) had BMD measurement, whereas of all other fractures (assessed by questionnaire) 71% also had a BMD measurement. The control group used in the fracture case control analysis (n= 35,400) were genotyped on Illumina Hap300k through other projects at deCODE. A summary of the Icelandic

study populations' characteristics is given in Appendix Table 1A and 1B. All participants gave informed consent and the study was approved by the Data Protection Commission of Iceland (DPC) and the National Bioethics Committee of Iceland.

The Danish samples were derived from the Prospective Epidemiological Risk Factor (PERF study)<sup>1,2</sup>. These are postmenopausal women (n = 2,269), in the age range 55–86 years, taking part in a prospective epidemiological study and in various clinical trials for osteoporosis at the Center for Clinical and Basic Research, Copenhagen. Baseline DEXA- measurement (Hologic QDR2000) at the hip (total hip) and lumbar spine (L2–L4) was used for 2,269 with spine measure and for 2,244 with hip measure.

Osteoporotic fractures included self-reported low trauma fractures and vertebral fractures assessed by digital measurements of morphologic changes. 64% of the fracture cases also had a BMD measurement. A summary of the Danish study population's characteristics is given in Appendix Tables 1A and 1B. The study was approved by the Ethical Committee of Copenhagen County and was in accordance with the principles of the Helsinki.

The Australian cohort in this study is from the Dubbo Osteoporosis Epidemiology Study (DOES)<sup>3</sup>, including 571 males and 920 females in the age range 60-99 years. All are of Caucasian ethnicity. Bone mineral density was measured at the lumbar spine and the hip femoral neck (FNBMD) by DEXA (LUNAR DPX-L). Osteoporotic fractures included low trauma fractures assessed by questionnaire and ascertained by reviewing all radiography reports. All fracture cases also had a BMD measurement. The study was approved by the St. Vincent's Ethics Review Committee (Sydney), and all subjects gave written informed consent. A summary of the Australian study population's characteristics is given in Appendix Table 1A and 1B.

## **Illumina Genotyping**

Samples for the genome-wide association study were assayed with the Infinium humanHap300 or humanCNV370 SNP chips (Illumina). Three different versions of the chips were used, humanHap300, humanHap300-duo and humanCNV370. The analysis was restricted to SNPs that had a call rate of 97% on each of the chip types, a combined call rate of 98% and did not deviate from Hardy Weinberg equilibrium ( $p > 10^{-7}$ ) on any chip type. Thus, the final analyses are based on 301,019 SNPs.

## **Single SNP Genotyping**

All single-SNP genotyping was carried out at deCODE Genetics on the Centaurus (Nanogen) platform<sup>4</sup>. The quality of each Centaurus SNP assay was evaluated by genotyping each assay in the CEU HapMap samples and comparing the results with the HapMap data. The Icelandic replication set contained 300 individuals that were also genotyped on the humanCNV370 chip and used for genotype comparisons. Assays with a mismatch rate  $> 1.5\%$  were not used, and a linkage disequilibrium (LD) test was used for markers known to be in LD.

## **Association analysis**

Age and weight corrected BMD was computed for each sex and population separately to have a mean 0 and standard deviation 1 (commonly known as weight corrected Z-scores in the bone field<sup>5</sup>). BMD increased linearly with weight in both genders. For women we modelled BMD to decrease linearly after the age of 45 while for men we modelled BMD to decrease linearly in all age ranges. For the Icelandic and Danish populations regression was done against a randomly recruited reference group<sup>2,6</sup>. In the Australian cohort correction was done against the whole cohort, which consists of majority of individuals 60 years and older in Dubbo, Australia<sup>3</sup>. For each SNP, a

linear regression, using the genotype as an additive covariate and standardized BMD as a response, was fitted to test for association. We tested the additive model against the full model (i.e. treating the genotype as a categorical variable) and no significant deviation from the additive model was detected ( $p > 0.1$  for all SNPs in Table 1, 2 and 3).

For the Icelandic discovery sample, the method of genomic control<sup>7</sup> was used to adjust for the relatedness of the subjects. To do that, we transformed the (unadjusted) P values, based on the t-tests, to 1-df chi-square statistics. The inflation factor  $\lambda$  for the chi-square statistics was estimated as 1.18 for hip BMD and 1.22 for spine BMD. The unadjusted chi-square statistics were divided by  $\lambda$  to obtain the adjusted test statistics. For the combined analysis an inflation factor for the test statistics was computed using simulations using our genealogical database: We create simulated genotypes by choosing uniformly at random a minor allele frequency as a multiple of 5% in the range 5% to 50%. We then randomly assign alleles to individuals born in the year 1700 or earlier. Individuals born after year 1700 were randomly assigned one of their parents' genotypes. The P values obtained from associating the BMD to these genotypes, assuming that the patients are unrelated, was converted to a corresponding 1 df chi<sup>2</sup> statistic that gives the same p value. This chi<sup>2</sup> statistic was then divided by the inflation factor to obtain the adjusted chi<sup>2</sup> statistic and the adjusted p value. This inflation factor was estimated as  $\lambda = 1.21$  (hip) and 1.22 (spine). For comparison purposes we also simulated inflation factor for the original population, these were estimated as  $\lambda = 1.15$  (hip) and 1.13 (spine). The actual sample size divided by this inflation factor was used as an estimate of the effective sample size. An overall Z -score was calculated by summing the Z -scores weighted by the square root of the effective sample size, over all populations, and dividing by the square root of the sum of the sample sizes. An overall estimate of the effect per allele was calculated by weighting together the effects in each population by the population's effective sample size.

For comparison we also applied the EIGENSTRAT method<sup>8</sup>, which relies on patterns of correlation between individuals to detect stratification, to our Icelandic discovery sample. Due to computational constraints we restricted our analysis to approximately one third of the available SNPs (n=103,516). No evidence of substantial stratification was detected, with the largest principal component estimated to explain 0.1% of the overall variation of the genotype data. Consequently, accounting for the 30 largest principal components identified by EIGENSTRAT had a miniscule effect on significance. The largest correction, for the SNPs in this report, was for rs9479055 and corresponded to dividing its  $\chi^2$ -statistic by 1.003. Thus, we concluded that correction based on the EIGENSTRAT method would not improve the quality of our analysis.

For association analysis of osteoporotic fractures a standard likelihood ratio statistics was used, as implemented in the NEMO software created at deCODE, to calculate two-sided P values and odds ratio (OR) for each individual allele, assuming a multiplicative model for risk, i.e., that the risk of the two alleles a person carries multiply. Allelic frequencies, rather than carrier frequencies are presented for the markers. The haplotype frequencies were estimated using their maximum likelihood estimates and a test of differences between groups was carried out using a generalized likelihood ratio test. When testing for risk of a variant given the risk of a previously reported variant or a set of previously reported variants the likelihood of the model that included a risk contribution from any of the previously reported markers and the new marker was tested versus the likelihood of the model that only included only a risk contribution from any of the previously reported markers. Our program, NEMO, was used for all haplotype analysis, for evaluating the measures of LD between individual markers and for linear regression analysis of haplotypes.

Results from multiple case-control groups were combined using a Mantel-Haenszel model in which the groups were allowed to have different population

frequencies for alleles, haplotypes and genotypes but were assumed to have a common relative risk<sup>9</sup>.

To test for possible interactions between different loci found we selected one SNP from each of our associated loci. For each pair of markers we then tested a model that included an additive effect from both loci as well as a multiplicative interaction term for the number of risk alleles at each locus against a model that included only the two additive terms. No significant interaction between loci was detected ( $p > 0.05$  for all pairs).

#### **Refinement of associated signals:**

**Chr13q14:** We considered all SNPs within 250 kb in either direction from rs954759, corresponding approximately to two haplotype blocks in either direction. We found that conditional on the association with the most highly associated marker in the region, rs9594759, a significant association was found to the marker rs10507508 ( $p = 1.96 \times 10^{-5}$ , 0.0011 when correcting for 59 markers in region). Further, we computed associations with a linear combination of haplotypes chosen to act as surrogates to HapMap markers in the region. Surrogate to the two equivalent markers, rs9533090 and rs9594738, was the most significantly associated marker with spine BMD ( $p = 9.56 \times 10^{-12}$ ).

**Chr6q25:** Two markers were genome-wide significant in the upstream region of *ESR1*; rs2504063 ( $p = 5.68 \times 10^{-8}$ ) and rs851982 ( $p = 1.56 \times 10^{-7}$ ). These markers are highly correlated, but not equivalent ( $d_{\text{prime}} = 1$ ,  $r_2 = 0.47$ ). 16 other markers, within 100 kb of these two, were selected for further study. None of these 18 markers were equivalent and the highest  $r_2$  between a pair of markers was 0.79. No surrogate for a

HapMap marker was found that showed a significantly higher level of association than rs2504063. Conditioned on the association with the most highly associated marker a significant association was still found to 14 of the remaining 17 markers in the region. Conditioned on the association from two markers in the region a significant association was still found to other markers in the region. We reconsidered this analysis for the five markers that replicated in our replication cohort and were genome-wide significant in the combined analysis. Given the association from any two of these markers a significant association was still observed from one of the three remaining markers. Conditioned on an association observed at rs1038304, rs1999805 and rs4870044 no residual association was found to the other two markers.

#### **Suggestive loci:**

Some of the loci that did not reach genome-wide significance in our analysis replicated or showed evidence of association with osteoporotic fractures.

A SNP, rs11898505, in the *SPTBN1* (spectrin beta non-erythrocytic 1) gene on 2p16 was nearly genome-wide significant in the combined Icelandic samples ( $P = 2.0 \times 10^{-7}$ ) but did not replicate consistently in the other populations (Table 3). However, this SNP associated with osteoporotic fractures in all sample sets with an OR 1.11 and  $P = 1.8 \times 10^{-4}$  in the combined overall analysis (Table 4). Vertebral fractures were individually the most associated ones with OR 1.29 and  $P$  value of  $1.5 \times 10^{-4}$  in the overall analysis (Appendix Table 5). The *SPTBN1* gene encodes a major cytoskeletal scaffolding protein and has not, to our knowledge, been considered to play a specific role in bone biology or BMD regulation (Appendix Figure 1G). The gene has a wide tissue expression, including bone and bone marrow (Unigene Hs.503178, Hs.705692).

Another region that showed only a modest association with BMD but associated with fractures was around the *LRP4* (low density lipoprotein receptor-related protein 4) gene on 11p11. We chose to follow this region, not only because of overrepresentation of markers in the region, but also because the sequence and domain organization of *LRP4* shows significant similarities to those of members of the LDL receptor family, including the *LRP5* and *LRP6* (low density lipoprotein receptor-related protein 6) genes, both of which have been reported to associate with BMD or osteoporosis<sup>10</sup>. The SNP rs2306033, resulting in the conservative change of alanine to valine at codon 1203 in exon 26 of the *LRP4* gene, associated modestly with hip BMD with an overall *P* value  $4.0 \times 10^{-5}$  (Table 3), but associated also with osteoporotic fractures in the overall combined analysis with OR 1.11 and *P* value  $7.4 \times 10^{-3}$  (Table 4). Three other SNPs in the region replicated in the combined Danish and Australian sample sets for BMD and were associated with osteoporotic fractures, although the overall *P* values of these SNPs were only in the range of  $P 10^{-3}$  to  $P 10^{-4}$  in the BMD association analysis (Appendix Table 3, 5, Figure 1H).

Other regions of interest included the *Osx* (*Osterix*, also known as *SP7*) gene on 12q13, with SNPs that ranked as the 6<sup>th</sup> and 7<sup>th</sup> markers in the spine genome-scan (Appendix Table 1A). This is a transcription factor that is essential to osteoblast differentiation<sup>11</sup> and therefore a strong candidate gene for influencing bone density. The SNP, rs10876432, replicated well in the Icelandic sample set and showed similar effect in the other populations, although these were not individually significant (Appendix Table 3A, Appendix Figure 1I). No association was observed with fractures for this SNP.

#### **References:**

1. Tanko LB, Bagger YZ, Nielsen SB, Christiansen C. Does serum cholesterol contribute to vertebral bone loss in postmenopausal women? *Bone* 2003;32(1):8.

2. Bagger Y, Rasmussen H, Alexandersen P, et al. Links between cardiovascular disease and osteoporosis in postmenopausal women: serum lipids or atherosclerosis per se? *Osteoporosis International* 2007;18(4):505.
3. Nguyen TV, Sambrook PN, Eisman JA. Sources of variability in bone mineral density measurements: implications for study design and analysis of bone loss. *J Bone Miner Res* 1997;12(1):124-35.
4. Kutuyavin IV, Milesi D, Belousov Y, et al. A novel endonuclease IV post-PCR genotyping system. *Nucl Acids Res* 2006;34(19):e128-.
5. Kanis JA, McCloskey EV, Johansson H, Oden A, Melton LJ, 3rd, Khaltayev N. A reference standard for the description of osteoporosis. *Bone* 2008;42(3):467-75.
6. Gudmundsdottir SL, Indridason OS, Franzson L, Sigurdsson G. Age-related decline in bone mass measured by dual-energy X-ray absorptiometry and quantitative ultrasound in a population-based sample of both sexes: identification of useful ultrasound thresholds for osteoporosis screening. *J Clin Densitom* 2005;8(1):80-6.
7. Devlin B, Roeder K. Genomic Control for Association Studies. *Biometrics* 1999;55(4):997-1004.
8. Price AL, Patterson NJ, Plenge RM, Weinblatt ME, Shadick NA, Reich D. Principal components analysis corrects for stratification in genome-wide association studies. *Nat Genet* 2006;38(8):904.
9. Mantel N, Haenszel W. Statistical aspects of the analysis of data from retrospective studies of disease. *J Natl Cancer Inst* 1959;22(4):719-48.
10. van Meurs JBJ, Rivadeneira F, Jhamai M, et al. Common Genetic Variation of the Low-Density Lipoprotein Receptor-Related Protein 5 and 6 Genes Determines Fracture Risk in Elderly White Men. *Journal of Bone and Mineral Research* 2006;21(1):141-50.
11. Gao Y, Jheon A, Nourkeyhani H, Kobayashi H, Ganss B. Molecular cloning, structure, expression, and chromosomal localization of the human Osterix (SP7) gene. *Gene* 2004;341:101.

**SUPPLEMENTARY TABLES:**

**Supplementary Table 1A Study Population Characteristics**

|                                      | Iceland discovery |                | Iceland Replication |                | Denmark        | Australia     |               |
|--------------------------------------|-------------------|----------------|---------------------|----------------|----------------|---------------|---------------|
|                                      | Men               | Women          | Men                 | Women          | Women          | Men           | Women         |
| #                                    | 776               | 5085           | 982                 | 3183           | 2269           | 571           | 920           |
| Age (SD), y                          | 66.2 (14.3)       | 59.4 (14.1)    | 56.6 (16.7)         | 58.1 (14.3)    | 72.4 (5.7)     | 85.6 (5.5)    | 76.1 (6.3)    |
| Age-range, y                         | 18-96             | 18-98          | 18-88               | 18-92          | 55-86          | 61-90         | 60-99         |
| BMI (SD)                             | 26.7 (4.1)        | 26.1 (4.7)     | 26.4 (3.8)          | 25.8 (4.4)     | 25.7 (3.5)     | 26.7 (4.0)    | 26.2 (5.0)    |
| Height (SD), cm                      | 176.4 (6.6)       | 164.2 (7.0)    | 178.2 (6.6)         | 164.3 (7.3)    | 160.5 (5.8)    | 171.3 (6.4)   | 157.9 (6.2)   |
| Weight (SD), kg                      | 83.4 (14.6)       | 70.5 (13.2)    | 83.4 (13.8)         | 69.9 (12.5)    | 65.8 (9.9)     | 78.4 (13.1)   | 65.4 (13.3)   |
| raw HipBMD (SD), g/cm <sup>2</sup>   | 0.931 (0.161)     | 0.820 (0.161)  | 0.970 (0.172)       | 0.878 (0.158)  | 0.788 (0.134)  | 0.899 (0.162) | 0.750 (0.126) |
| HipBMDcorr. (SD)                     | -0.303 (1.062)    | -0.493 (1.032) | -0.125 (1.216)      | -0.004 (1.161) | -0.048 (1.022) | 0.000 (1.000) | 0.000 (1.000) |
| raw SpineBMD (SD), g/cm <sup>2</sup> | 1.015 (0.179)     | 0.944 (0.171)  | 1.022 (0.195)       | 1.011 (0.190)  | 0.875 (0.166)  | 1.276 (0.233) | 1.031 (0.203) |
| SpineBMDcorr. (SD)                   | -0.381 (1.194)    | -0.403 (1.085) | -0.410 (1.373)      | 0.061 (1.209)  | -0.055 (1.066) | 0.000 (1.000) | 0.000 (1.000) |

**Supplementary Table 1B Osteoporotic fractures in study populations**

| Fracture Type  | Iceland | Denmark | Australia |
|----------------|---------|---------|-----------|
| Any Low Trauma | 2986    | 905     | 550       |
| Vertebral      | 263     | 203     | 251       |
| Hip            | 1087    | 101     | 156       |
| Forearm        | 1057    | 515     | 125       |

## Supplementary Table 2A

## Top 50 signals in Spine-QTL analysis

| SNP          | P-value  | Chr.  | Position* | Freq. | Effect on Z score+      | Close to Gene     |
|--------------|----------|-------|-----------|-------|-------------------------|-------------------|
| T rs9594759  | 1.17E-08 | chr13 | 41930593  | 0.632 | -0.133 (-0.179, -0.087) | RANKL, AKAP11     |
| G rs2504063  | 5.68E-08 | chr6  | 152132400 | 0.615 | 0.125 (0.080, 0.170)    | ESR1              |
| T rs851982   | 1.56E-07 | chr6  | 152066678 | 0.609 | -0.119 (-0.164, -0.075) | ESR1              |
| T rs2504070  | 4.62E-07 | chr6  | 152126666 | 0.309 | -0.123 (-0.171, -0.075) | ESR1              |
| G rs7992970  | 8.50E-07 | chr13 | 41843463  | 0.216 | 0.134 (0.081, 0.188)    | RANKL, AKAP11     |
| G rs10876432 | 1.01E-06 | chr12 | 52018158  | 0.273 | 0.123 (0.074, 0.172)    | Osx (SP7)         |
| G rs2016266  | 1.04E-06 | chr12 | 52014222  | 0.316 | 0.117 (0.070, 0.164)    | Osx (SP7)         |
| G rs11898505 | 1.73E-06 | chr2  | 54538061  | 0.689 | -0.116 (-0.164, -0.069) | SPTBN1            |
| T rs1999805  | 2.27E-06 | chr6  | 152110057 | 0.563 | 0.107 (0.063, 0.152)    | ESR1              |
| T rs3020331  | 3.41E-06 | chr6  | 152050473 | 0.438 | 0.103 (0.060, 0.146)    | ESR1              |
| T rs4870044  | 4.09E-06 | chr6  | 151943102 | 0.284 | -0.114 (-0.163, -0.066) | ESR1, C6orf97     |
| G rs1377172  | 5.21E-06 | chr18 | 57447361  | 0.672 | 0.109 (0.062, 0.156)    | CDH20, RNF152     |
| G rs1286077  | 5.85E-06 | chr14 | 90516137  | 0.127 | 0.151 (0.085, 0.216)    | RPS6KA5           |
| T rs4810077  | 6.77E-06 | chr20 | 55477509  | 0.646 | 0.106 (0.060, 0.152)    | HMG1L1, CTCFL     |
| G rs7752591  | 6.94E-06 | chr6  | 151988761 | 0.519 | 0.101 (0.057, 0.145)    | ESR1, C6orf97     |
| T rs3780674  | 7.21E-06 | chr9  | 122206740 | 0.146 | 0.142 (0.080, 0.203)    | CDK5RAP2          |
| G rs10125592 | 8.07E-06 | chr9  | 122201556 | 0.146 | 0.141 (0.079, 0.203)    | CDK5RAP2          |
| T rs1286147  | 8.08E-06 | chr14 | 90537320  | 0.873 | -0.148 (-0.213, -0.083) | RPS6KA5           |
| G rs1038304  | 8.25E-06 | chr6  | 151974868 | 0.472 | -0.100 (-0.144, -0.056) | ESR1, C6orf97     |
| G rs6469804  | 8.53E-06 | chr8  | 120114010 | 0.482 | 0.100 (0.056, 0.144)    | OPG, COLEC10      |
| T rs2244352  | 8.95E-06 | chr21 | 39679843  | 0.340 | -0.105 (-0.151, -0.059) | WRB               |
| T rs4315567  | 9.65E-06 | chr2  | 54509448  | 0.301 | 0.109 (0.061, 0.157)    | SPTBN1            |
| C rs2872375  | 1.24E-05 | chr3  | 78378354  | 0.690 | -0.106 (-0.154, -0.059) |                   |
| G rs10505328 | 1.28E-05 | chr8  | 119219639 | 0.496 | 0.099 (0.054, 0.143)    | SAMD12,EXT1, RANK |
| T rs3851406  | 1.30E-05 | chr3  | 169807659 | 0.909 | -0.169 (-0.246, -0.093) |                   |
| T rs12273926 | 1.32E-05 | chr11 | 83346437  | 0.852 | 0.138 (0.076, 0.200)    | DLG2              |
| T rs10507507 | 1.60E-05 | chr13 | 41867646  | 0.823 | -0.126 (-0.184, -0.069) | RANKL, AKAP11     |
| G rs12479765 | 1.68E-05 | chr20 | 33288794  | 0.838 | -0.129 (-0.188, -0.07)  | MMP24             |
| G rs1917098  | 1.76E-05 | chr3  | 78386915  | 0.285 | 0.107 (0.058, 0.155)    |                   |
| T rs4391370  | 1.91E-05 | chr7  | 84105660  | 0.181 | -0.124 (-0.181, -0.067) | BX647900, SEMA3D  |
| G rs2504065  | 1.97E-05 | chr6  | 152136860 | 0.493 | -0.096 (-0.140, -0.052) | ESR1              |
| G rs3783833  | 2.02E-05 | chr14 | 90505343  | 0.141 | 0.135 (0.073, 0.198)    | RPS6KA5           |
| T rs713485   | 2.15E-05 | chr18 | 57421905  | 0.666 | 0.101 (0.055, 0.148)    | CDH20, RNF152     |
| T rs7028896  | 2.19E-05 | chr9  | 132521981 | 0.064 | 0.196 (0.105, 0.286)    | PRDM12, FUBP3     |
| G rs10403583 | 2.46E-05 | chr19 | 43983611  | 0.800 | -0.118 (-0.173, -0.063) | LGALS4, LGALS7    |
| T rs4830487  | 7.64E-05 | chrX  | 13040405  | 0.606 | -0.086 (-0.129, -0.044) |                   |
| T rs7595929  | 2.78E-05 | chr2  | 54479744  | 0.347 | 0.099 (0.053, 0.145)    | SPTBN1            |
| G rs4147528  | 2.82E-05 | chr8  | 119202598 | 0.507 | -0.095 (-0.139, -0.05)  | SAMD12,EXT1, RANK |
| G rs6929137  | 3.00E-05 | chr6  | 151978370 | 0.703 | 0.101 (0.054, 0.149)    | ESR1, C6orf97     |
| T rs1350929  | 3.08E-05 | chr3  | 111951197 | 0.446 | 0.093 (0.049, 0.137)    |                   |
| T rs11246386 | 3.26E-05 | chr11 | 1034938   | 0.231 | 0.111 (0.059, 0.163)    | MUC2              |
| T rs1401207  | 3.30E-05 | chr16 | 78919303  | 0.762 | -0.111 (-0.164, -0.059) |                   |
| T rs1398330  | 3.36E-05 | chr3  | 78405572  | 0.224 | 0.110 (0.058, 0.162)    |                   |
| G rs6942152  | 3.53E-05 | chr6  | 155469316 | 0.204 | -0.116 (-0.171, -0.061) | TIAM2             |
| T rs6993813  | 3.59E-05 | chr8  | 120121419 | 0.495 | 0.093 (0.049, 0.137)    | OPG, COLEC10      |
| G rs7753676  | 3.62E-05 | chr6  | 151918508 | 0.373 | -0.095 (-0.140, -0.050) | ESR1, C6orf97     |
| T rs6899351  | 3.80E-05 | chr6  | 123150805 | 0.695 | 0.099 (0.052, 0.146)    | SMPDL3A           |
| G rs1006899  | 3.87E-05 | chr21 | 14766923  | 0.153 | 0.128 (0.067, 0.189)    | SAMSN1            |
| T rs9306419  | 3.97E-05 | chr22 | 24699358  | 0.117 | 0.144 (0.075, 0.212)    | MYO18B            |
| T rs9375185  | 4.13E-05 | chr6  | 123160199 | 0.827 | 0.121 (0.063, 0.179)    | SMPDL3A           |

\* Build 36 position

+ Effect on each allele of the SNP on standardized BMD, given as SD units, with 95% confidence intervals

Supplementary Table 2B

Top 50 signals in Hip-QTL analysis

| SNP          | P-value  | Chr.  | Position* | Freq. | Effect on Z score+     | Close to Gene                               |
|--------------|----------|-------|-----------|-------|------------------------|---------------------------------------------|
| T rs6696981  | 1.15E-06 | chr1  | 22575445  | 0.138 | 0.149 (0.089,0.208)    | ZBTB40, WNT4                                |
| G rs7752591  | 2.16E-06 | chr6  | 151988761 | 0.519 | 0.100 (0.059,0.141)    | ESR1, C6orf97                               |
| G rs7524102  | 2.58E-06 | chr1  | 22571034  | 0.177 | 0.130 (0.076,0.184)    | ZBTB40, WNT4                                |
| G rs7676236  | 3.94E-06 | chr4  | 102793390 | 0.321 | -0.105 (-0.150,-0.061) | BANK1                                       |
| G rs907580   | 4.54E-06 | chr9  | 99662418  | 0.713 | 0.107 (0.061,0.152)    | FOXE1                                       |
| G rs1007738  | 7.10E-06 | chr11 | 46805936  | 0.231 | 0.113 (0.064,0.162)    | CKAP5, LRP4                                 |
| G rs2892966  | 7.86E-06 | chr4  | 122864017 | 0.380 | 0.097 (0.055,0.140)    | ANXA5, TMEM155                              |
| G rs2037957  | 8.03E-06 | chr8  | 134528403 | 0.666 | -0.101 (-0.145,-0.057) | ST3GAL1                                     |
| T rs3020331  | 8.15E-06 | chr6  | 152050473 | 0.437 | 0.093 (0.052,0.134)    | ESR1                                        |
| G rs10497621 | 9.82E-06 | chr2  | 183705688 | 0.086 | 0.164 (0.092,0.237)    | NUP35                                       |
| T rs4692511  | 9.86E-06 | chr4  | 30973757  | 0.146 | 0.132 (0.074,0.191)    | PCDH7                                       |
| G rs7024345  | 1.14E-05 | chr9  | 99635059  | 0.710 | 0.102 (0.056,0.148)    | FOXE1                                       |
| G rs8100029  | 1.27E-05 | chr19 | 7354832   | 0.044 | -0.228 (-0.330,-0.125) | ARHGEF18                                    |
| G rs1038304  | 1.42E-05 | chr6  | 151974868 | 0.472 | -0.092 (-0.133,-0.050) | ESR1, C6orf97                               |
| T rs851982   | 1.59E-05 | chr6  | 152066678 | 0.609 | -0.092 (-0.134,-0.050) | ESR1                                        |
| T rs4516411  | 1.62E-05 | chr2  | 39322180  | 0.930 | 0.180 (0.098,0.262)    | MAP4K3, CDKL4                               |
| T rs6900157  | 1.63E-05 | chr6  | 151995820 | 0.684 | 0.097 (0.053,0.141)    | ESR1, C6orf97                               |
| G rs6929137  | 1.84E-05 | chr6  | 151978370 | 0.702 | 0.098 (0.053,0.143)    | ESR1, C6orf97                               |
| G rs12437971 | 2.14E-05 | chr15 | 98662088  | 0.438 | -0.091 (-0.133,-0.049) | ADAMTS17                                    |
| G rs4075039  | 2.22E-05 | chr3  | 118645474 | 0.856 | -0.129 (-0.188,-0.069) |                                             |
| T rs12775433 | 2.82E-05 | chr10 | 101824082 | 0.340 | 0.094 (0.050,0.139)    | CPN1                                        |
| T rs2451255  | 3.04E-05 | chr6  | 159430804 | 0.557 | -0.089 (-0.130,-0.047) | TAGAP                                       |
| T rs2847351  | 3.14E-05 | chr18 | 10437041  | 0.657 | -0.093 (-0.137,-0.049) | APCDD1                                      |
| T rs1332498  | 3.33E-05 | chr1  | 150957072 | 0.592 | 0.088 (0.047,0.130)    | LCE4A                                       |
| T rs884013   | 3.62E-05 | chr18 | 44710128  | 0.070 | 0.169 (0.089,0.250)    | SMAD7                                       |
| G rs10137819 | 3.91E-05 | chr14 | 100464694 | 0.434 | -0.088 (-0.131,-0.046) |                                             |
| T rs873775   | 4.02E-05 | chr1  | 150959096 | 0.592 | 0.087 (0.046,0.129)    | LCE4A                                       |
| T rs4482635  | 4.10E-05 | chr3  | 25045902  | 0.878 | -0.133 (-0.196,-0.069) |                                             |
| C rs7524281  | 4.10E-05 | chr1  | 151049879 | 0.599 | 0.088 (0.046,0.130)    | LCE1B                                       |
| G rs3018362  | 4.25E-05 | chr18 | 58233073  | 0.637 | 0.090 (0.047,0.133)    | RANK                                        |
| G rs10838635 | 4.70E-05 | chr11 | 46901803  | 0.240 | 0.101 (0.052,0.150)    | LRP4                                        |
| G rs7543680  | 4.75E-05 | chr1  | 22603856  | 0.763 | -0.102 (-0.151,-0.053) | ZBTB40                                      |
| T rs7645105  | 4.79E-05 | chr3  | 118808141 | 0.590 | 0.087 (0.045,0.129)    |                                             |
| T rs11600292 | 5.09E-05 | chr11 | 46915274  | 0.760 | -0.101 (-0.150,-0.052) | C11orf49, LRP4                              |
| T rs6485702  | 5.74E-05 | chr11 | 46855347  | 0.357 | 0.088 (0.045,0.131)    | LRP4                                        |
| G rs7751941  | 5.98E-05 | chr6  | 151988351 | 0.788 | 0.102 (0.052,0.152)    | ESR1, C6orf97                               |
| T rs2043644  | 6.07E-05 | chr4  | 148959669 | 0.090 | -0.147 (-0.219,-0.075) | ARHGAP10                                    |
| G rs6485690  | 6.36E-05 | chr11 | 46755207  | 0.643 | -0.088 (-0.131,-0.045) | CKAP5, LRP4                                 |
| G rs2232965  | 6.55E-05 | chr19 | 18287950  | 0.795 | 0.106 (0.054,0.159)    | LSM4                                        |
| T rs524410   | 6.56E-05 | chr6  | 159418118 | 0.442 | 0.085 (0.043,0.127)    | TAGAP                                       |
| C rs10008779 | 6.91E-05 | chr4  | 168473476 | 0.507 | -0.084 (-0.126,-0.043) | SPOCK3, CR614646<br>MSH3, DHFR,<br>RASGRF2  |
| G rs33013    | 6.96E-05 | chr5  | 80095772  | 0.601 | -0.086 (-0.129,-0.044) |                                             |
| T rs5896     | 7.20E-05 | chr11 | 46701579  | 0.151 | 0.117 (0.059,0.175)    | F2, LRP4                                    |
| T rs5936694  | 7.42E-05 | chrX  | 68612237  | 0.710 | 0.086 (0.044,0.129)    | TMEM28                                      |
| T rs12143926 | 7.46E-05 | chr1  | 88276958  | 0.606 | -0.086 (-0.128,-0.043) |                                             |
| G rs7753676  | 7.48E-05 | chr6  | 151918508 | 0.374 | -0.086 (-0.128,-0.043) | ESR1, C6orf97                               |
| G rs7622520  | 7.71E-05 | chr3  | 67279910  | 0.441 | 0.085 (0.043,0.127)    | KBTBD8, SUCLG2<br>FLJ42408, ZNF330,<br>IL15 |
| T rs10003871 | 7.92E-05 | chr4  | 142479872 | 0.641 | -0.087 (-0.130,-0.044) |                                             |
| T rs4507007  | 7.95E-05 | chr18 | 57537499  | 0.868 | 0.123 (0.062,0.185)    | CDH20, RNF152                               |
| T rs10510248 | 8.12E-05 | chr3  | 3023519   | 0.757 | 0.096 (0.048,0.144)    | CNTN4, IL5RA                                |

\* Build 36 position

+ Effect on each allele of the SNP on standardized BMD, given as SD units, with 95% confidence intervals

Supplementary Table 3A

## Spine BMD association analysis for all SNPs in replication effort

| SNP          | Pos.*        | Freq. | Iceland effect       | <i>P</i><br>Iceland | Denmark effect       | Australia effect     | DK and AUS<br>combined effect | DK and<br>AUS <i>P</i><br>value | Overall combined<br>effect | <i>P</i> value |
|--------------|--------------|-------|----------------------|---------------------|----------------------|----------------------|-------------------------------|---------------------------------|----------------------------|----------------|
| A rs7524102  | C1_22571034  | 0.817 | -0.13 (-0.17, -0.08) | 1.78E-07            | -0.12 (-0.21, -0.02) | -0.04 (-0.14, 0.07)  | -0.09 (-0.15, -0.02)          | 0.012                           | -0.11 (-0.15, -0.07)       | 9.22E-09       |
| G rs6696981  | C1_22575445  | 0.858 | -0.14 (-0.19, -0.08) | 2.85E-07            | -0.11 (-0.22, 0.00)  | -0.01 (-0.14, 0.12)  | -0.07 (-0.15, 0.01)           | 0.083                           | -0.12 (-0.16, -0.07)       | 1.69E-07       |
| T rs4516411  | C2_39322180  | 0.930 | 0.05 (-0.02, 0.12)   | 0.20                | 0.01 (-0.12, 0.13)   | -0.01 (-0.15, 0.13)  | -0.00 (-0.06, 0.06)           | 0.97                            | 0.03 (-0.03, 0.09)         | 0.29           |
| C rs7595929  | C2_54479744  | 0.640 | -0.09 (-0.13, -0.05) | 5.64E-06            | 0.02 (-0.05, 0.10)   | 0.01 (-0.08, 0.10)   | 0.02 (-0.03, 0.07)            | 0.46                            | -0.06 (-0.09, -0.02)       | 0.00073        |
| G rs4315567  | C2_54509448  | 0.685 | -0.10 (-0.14, -0.06) | 6.38E-07            | 0.04 (-0.03, 0.11)   | -0.02 (-0.11, 0.06)  | 0.02 (-0.04, 0.07)            | 0.54                            | -0.06 (-0.10, -0.03)       | 0.00014        |
| G rs11898505 | C2_54538061  | 0.674 | -0.10 (-0.14, -0.06) | 2.03E-07            | -0.02 (-0.09, 0.06)  | -0.04 (-0.13, 0.04)  | -0.03 (-0.08, 0.02)           | 0.28                            | -0.08 (-0.11, -0.05)       | 8.4E-07        |
| G rs10497621 | C2_183705688 | 0.087 | 0.08 (0.01, 0.14)    | 0.021               | -0.04 (-0.17, 0.09)  | 0.04 (-0.13, 0.21)   | -0.01 (-0.11, 0.09)           | 0.86                            | 0.05 (-0.00, 0.10)         | 0.067          |
| T rs10510248 | C3_3023519   | 0.767 | 0.02 (-0.03, 0.06)   | 0.45                | 0.02 (-0.10, 0.07)   | -0.04 (-0.15, 0.08)  | -0.02 (-0.08, 0.04)           | 0.51                            | 0.01 (-0.03, 0.05)         | 0.77           |
| C rs2872375  | C3_78378354  | 0.683 | -0.07 (-0.11, -0.03) | 0.00022             | -0.02 (-0.09, 0.06)  | -0.04 (-0.13, 0.05)  | -0.03 (-0.08, 0.02)           | 0.30                            | -0.06 (-0.09, -0.03)       | 0.00026        |
| G rs1398330  | C3_78405572  | 0.767 | -0.09 (-0.13, -0.05) | 0.000036            | -0.03 (-0.11, 0.05)  | -0.06 (-0.16, 0.04)  | -0.04 (-0.10, 0.02)           | 0.16                            | -0.08 (-0.11, -0.04)       | 0.000025       |
| G rs1350929  | C3_111951197 | 0.557 | -0.04 (-0.08, -0.00) | 0.040               | -0.04 (-0.11, 0.03)  | -0.05 (-0.13, 0.03)  | -0.04 (-0.09, 0.00)           | 0.073                           | -0.04 (-0.07, -0.01)       | 0.0069         |
| T rs3851406  | C3_169807659 | 0.907 | -0.12 (-0.18, -0.06) | 0.00017             | -0.02 (-0.12, 0.09)  | -0.02 (-0.16, 0.12)  | -0.02 (-0.09, 0.06)           | 0.66                            | -0.09 (-0.14, -0.04)       | 0.00071        |
| T rs4692511  | C4_30973757  | 0.147 | 0.03 (-0.02, 0.08)   | 0.22                | 0.05 (-0.05, 0.15)   | 0.06 (-0.06, 0.17)   | 0.05 (-0.02, 0.12)            | 0.14                            | 0.04 (-0.00, 0.08)         | 0.068          |
| G rs7676236  | C4_102793390 | 0.323 | -0.05 (-0.09, -0.01) | 0.0071              | -0.02 (-0.10, 0.05)  | -0.02 (-0.11, 0.07)  | -0.02 (-0.07, 0.03)           | 0.46                            | -0.04 (-0.08, -0.01)       | 0.0078         |
| T rs2043644  | C4_148959669 | 0.086 | -0.09 (-0.15, -0.02) | 0.0085              | -0.00 (-0.11, 0.11)  | 0.06 (-0.12, 0.24)   | 0.02 (-0.07, 0.11)            | 0.67                            | -0.06 (-0.12, -0.00)       | 0.040          |
| C rs1265159  | C6_31248026  | 0.803 | -0.07 (-0.12, -0.03) | 0.0019              | -0.07 (-0.15, 0.02)  | -0.02 (-0.11, 0.07)  | -0.05 (-0.11, 0.01)           | 0.11                            | -0.07 (-0.10, -0.03)       | 0.00050        |
| A rs3132453  | C6_31712023  | 0.106 | -0.10 (-0.16, -0.04) | 0.00090             | 0.02 (-0.10, 0.14)   | 0.00 (-0.14, 0.14)   | 0.01 (-0.07, 0.09)            | 0.79                            | -0.06 (-0.11, -0.02)       | 0.0090         |
| G rs12198173 | C6_32134786  | 0.922 | -0.10 (-0.17, -0.03) | 0.0058              | -0.02 (-0.16, 0.11)  | -0.17 (-0.35, 0.01)  | -0.07 (-0.16, 0.03)           | 0.16                            | -0.09 (-0.15, -0.03)       | 0.0020         |
| C rs13199524 | C6_32174743  | 0.922 | -0.10 (-0.17, -0.03) | 0.0038              | -0.03 (-0.17, 0.11)  | -0.14 (-0.29, 0.02)  | -0.07 (-0.16, 0.02)           | 0.12                            | -0.09 (-0.15, -0.04)       | 0.0011         |
| T rs3130340  | C6_32352605  | 0.787 | -0.10 (-0.14, -0.05) | 0.000014            | -0.12 (-0.20, -0.04) | -0.04 (-0.14, 0.05)  | -0.09 (-0.15, -0.03)          | 0.0024                          | -0.10 (-0.13, -0.06)       | 1.17E-07       |
| T rs6899351  | C6_123150805 | 0.699 | 0.06 (0.02, 0.10)    | 0.0036              | -0.04 (-0.12, 0.04)  | -0.08 (-0.17, 0.01)  | -0.05 (-0.11, -0.00)          | 0.041                           | 0.02 (-0.01, 0.06)         | 0.20           |
| C rs9479055  | C6_151889660 | 0.348 | -0.08 (-0.12, -0.04) | 0.000023            | -0.06 (-0.13, 0.01)  | -0.07 (-0.16, 0.01)  | -0.07 (-0.11, -0.02)          | 0.0086                          | -0.08 (-0.11, -0.05)       | 6.22E-07       |
| T rs4463269  | C6_151903921 | 0.245 | -0.06 (-0.10, -0.01) | 0.010               | -0.05 (-0.13, 0.02)  | -0.15 (-0.24, -0.06) | -0.09 (-0.14, -0.04)          | 0.00053                         | -0.07 (-0.10, -0.03)       | 0.000050       |
| A rs3734803  | C6_151911338 | 0.158 | -0.07 (-0.12, -0.03) | 0.0030              | -0.15 (-0.25, -0.06) | -0.11 (-0.21, -0.00) | -0.13 (-0.20, -0.07)          | 0.000030                        | -0.09 (-0.13, -0.06)       | 1.68E-06       |
| T rs4869738  | C6_151933844 | 0.181 | -0.08 (-0.13, -0.04) | 0.00034             | -0.03 (-0.12, 0.06)  | -0.13 (-0.23, -0.04) | -0.07 (-0.13, -0.02)          | 0.013                           | -0.08 (-0.12, -0.04)       | 0.000013       |
| T rs4870044  | C6_151943102 | 0.281 | -0.12 (-0.16, -0.08) | 8.07E-09            | -0.11 (-0.19, -0.03) | -0.07 (-0.16, 0.02)  | -0.10 (-0.15, -0.04)          | 0.00048                         | -0.11 (-0.14, -0.08)       | 1.62E-11       |
| G rs1038304  | C6_151974868 | 0.469 | -0.12 (-0.16, -0.08) | 6.67E-11            | -0.05 (-0.12, 0.02)  | -0.06 (-0.14, 0.03)  | -0.05 (-0.10, -0.00)          | 0.035                           | -0.10 (-0.13, -0.07)       | 3.97E-11       |
| A rs6929137  | C6_151978370 | 0.298 | -0.12 (-0.16, -0.08) | 6.54E-09            | -0.08 (-0.15, -0.00) | -0.06 (-0.14, 0.03)  | -0.07 (-0.12, -0.02)          | 0.0066                          | -0.10 (-0.13, -0.07)       | 2.45E-10       |
| A rs7751941  | C6_151988351 | 0.214 | -0.13 (-0.17, -0.08) | 2.12E-08            | -0.06 (-0.14, 0.03)  | -0.03 (-0.13, 0.07)  | -0.05 (-0.10, 0.01)           | 0.11                            | -0.10 (-0.14, -0.07)       | 2.72E-08       |
| A rs852003   | C6_152003895 | 0.560 | -0.10 (-0.13, -0.06) | 3.29E-07            | -0.03 (-0.10, 0.04)  | -0.04 (-0.12, 0.05)  | -0.03 (-0.08, 0.01)           | 0.16                            | -0.08 (-0.11, -0.05)       | 4.68E-07       |
| G rs712219   | C6_152020132 | 0.597 | -0.10 (-0.13, -0.06) | 4.25E-07            | -0.02 (-0.09, 0.05)  | -0.04 (-0.13, 0.04)  | -0.03 (-0.08, 0.02)           | 0.24                            | -0.08 (-0.11, -0.05)       | 9.95E-07       |
| T rs851993   | C6_152047704 | 0.612 | -0.09 (-0.13, -0.06) | 1.14E-06            | -0.03 (-0.10, 0.04)  | 0.01 (-0.08, 0.09)   | -0.01 (-0.06, 0.04)           | 0.63                            | -0.07 (-0.10, -0.04)       | 0.000015       |
| C rs3020331  | C6_152050473 | 0.555 | -0.12 (-0.16, -0.09) | 3.12E-11            | -0.01 (-0.08, 0.06)  | -0.01 (-0.09, 0.08)  | -0.01 (-0.06, 0.04)           | 0.74                            | -0.09 (-0.12, -0.06)       | 1.05E-08       |
| T rs851982   | C6_152066678 | 0.602 | -0.13 (-0.17, -0.09) | 7.23E-12            | -0.00 (-0.08, 0.07)  | 0.01 (-0.08, 0.09)   | 0.00 (-0.04, 0.04)            | 0.96                            | -0.09 (-0.12, -0.06)       | 1.46E-08       |
| G rs1159327  | C6_152089715 | 0.714 | -0.09 (-0.13, -0.05) | 0.000025            | 0.04 (-0.04, 0.12)   | -0.05 (-0.15, 0.04)  | 0.00 (-0.07, 0.08)            | 0.92                            | -0.06 (-0.09, -0.03)       | 0.00058        |
| C rs1999805  | C6_152110057 | 0.437 | -0.10 (-0.13, -0.06) | 3.78E-07            | -0.06 (-0.13, 0.01)  | -0.07 (-0.16, 0.02)  | -0.06 (-0.11, -0.01)          | 0.015                           | -0.09 (-0.12, -0.06)       | 2.22E-08       |
| T rs2504070  | C6_152126666 | 0.316 | -0.09 (-0.13, -0.05) | 0.000013            | 0.04 (-0.04, 0.12)   | 0.00 (-0.09, 0.10)   | 0.03 (-0.03, 0.08)            | 0.34                            | -0.05 (-0.09, -0.02)       | 0.0019         |

|              |              |       |                      |          |                      |                      |                      |          |                      |          |
|--------------|--------------|-------|----------------------|----------|----------------------|----------------------|----------------------|----------|----------------------|----------|
| A rs2504063  | C6_152132400 | 0.381 | -0.11 (-0.15, -0.07) | 3.59E-09 | -0.04 (-0.11, 0.03)  | -0.04 (-0.12, 0.04)  | -0.04 (-0.09, 0.01)  | 0.10     | -0.09 (-0.12, -0.06) | 6.05E-09 |
| G rs2504065  | C6_152136860 | 0.489 | -0.10 (-0.13, -0.06) | 2.27E-07 | -0.03 (-0.10, 0.04)  | -0.03 (-0.11, 0.04)  | -0.03 (-0.08, 0.01)  | 0.17     | -0.08 (-0.11, -0.05) | 4.11E-07 |
| A rs10505328 | C8_119219639 | 0.506 | -0.09 (-0.12, -0.05) | 2.37E-06 | 0.04 (-0.03, 0.11)   | 0.02 (-0.08, 0.11)   | 0.03 (-0.02, 0.08)   | 0.22     | -0.05 (-0.08, -0.02) | 0.00093  |
| A rs6469804  | C8_120114010 | 0.510 | -0.14 (-0.17, -0.10) | 3.19E-13 | -0.07 (-0.14, -0.00) | -0.08 (-0.16, 0.00)  | -0.07 (-0.12, -0.03) | 0.0020   | -0.12 (-0.15, -0.09) | 7.42E-15 |
| C rs6993813  | C8_120121419 | 0.496 | -0.14 (-0.17, -0.10) | 1.71E-13 | -0.08 (-0.14, -0.01) | -0.05 (-0.14, 0.03)  | -0.07 (-0.12, -0.02) | 0.0062   | -0.12 (-0.15, -0.09) | 1.78E-14 |
| G rs7024345  | C9_99635059  | 0.716 | 0.02 (-0.02, 0.06)   | 0.31     | 0.00 (-0.11, 0.11)   | 0.04 (-0.05, 0.13)   | 0.02 (-0.04, 0.07)   | 0.52     | 0.02 (-0.01, 0.05)   | 0.23     |
| A rs10125592 | C9_122201556 | 0.851 | -0.11 (-0.16, -0.06) | 0.000021 | 0.00 (-0.10, 0.10)   | -0.04 (-0.16, 0.08)  | -0.03 (-0.11, 0.06)  | 0.53     | -0.09 (-0.14, -0.05) | 0.000042 |
| C rs3780674  | C9_122206740 | 0.851 | -0.11 (-0.16, -0.06) | 0.000016 | -0.02 (-0.11, 0.08)  | -0.02 (-0.13, 0.10)  | -0.02 (-0.08, 0.05)  | 0.66     | -0.08 (-0.12, -0.04) | 0.00012  |
| C rs7028896  | C9_132521981 | 0.937 | -0.13 (-0.20, -0.05) | 0.00066  | 0.01 (-0.11, 0.14)   | -0.09 (-0.23, 0.05)  | -0.03 (-0.10, 0.05)  | 0.52     | -0.10 (-0.16, -0.04) | 0.0014   |
| C rs11246386 | C11_1034938  | 0.768 | -0.11 (-0.15, -0.06) | 9.68E-07 | 0.01 (-0.07, 0.09)   | -0.06 (-0.16, 0.04)  | -0.02 (-0.07, 0.04)  | 0.59     | -0.08 (-0.12, -0.04) | 9.91E-06 |
| T rs5896     | C11_46701579 | 0.151 | 0.01 (-0.04, 0.06)   | 0.65     | -0.02 (-0.12, 0.08)  | 0.07 (-0.06, 0.19)   | 0.02 (-0.05, 0.09)   | 0.67     | 0.01 (-0.03, 0.05)   | 0.54     |
| G rs2306033  | C11_46854022 | 0.854 | -0.02 (-0.08, 0.03)  | 0.36     | 0.01 (-0.09, 0.11)   | -0.09 (-0.22, 0.04)  | -0.03 (-0.10, 0.04)  | 0.42     | -0.03 (-0.07, 0.02)  | 0.23     |
| T rs11039024 | C11_46879744 | 0.159 | 0.01 (-0.04, 0.06)   | 0.69     | -0.04 (-0.14, 0.06)  | 0.06 (-0.06, 0.17)   | -0.00 (-0.16, 0.16)  | 0.98     | 0.01 (-0.03, 0.05)   | 0.75     |
| G rs10838635 | C11_46901803 | 0.240 | 0.03 (-0.01, 0.07)   | 0.15     | -0.01 (-0.10, 0.07)  | 0.08 (-0.01, 0.18)   | 0.02 (-0.03, 0.08)   | 0.40     | 0.03 (-0.00, 0.06)   | 0.094    |
| T rs11600292 | C11_46915274 | 0.760 | -0.03 (-0.07, 0.02)  | 0.24     | 0.01 (-0.07, 0.10)   | -0.09 (-0.18, 0.01)  | -0.02 (-0.08, 0.03)  | 0.37     | -0.03 (-0.06, 0.01)  | 0.14     |
| G rs7935346  | C11_46964955 | 0.769 | -0.02 (-0.07, 0.02)  | 0.32     | -0.02 (-0.10, 0.07)  | -0.08 (-0.19, 0.02)  | -0.04 (-0.10, 0.01)  | 0.14     | -0.03 (-0.06, 0.01)  | 0.10     |
| G rs7121418  | C11_47121682 | 0.349 | 0.01 (-0.03, 0.05)   | 0.54     | 0.02 (-0.06, 0.09)   | 0.02 (-0.07, 0.11)   | 0.02 (-0.03, 0.07)   | 0.48     | 0.01 (-0.02, 0.04)   | 0.37     |
| G rs2279439  | C11_47153558 | 0.754 | -0.02 (-0.06, 0.02)  | 0.41     | -0.02 (-0.11, 0.06)  | -0.08 (-0.18, 0.02)  | -0.04 (-0.10, 0.01)  | 0.13     | -0.03 (-0.06, 0.01)  | 0.13     |
| A rs2016266  | C12_52014222 | 0.685 | -0.08 (-0.12, -0.04) | 0.000026 | -0.08 (-0.17, 0.02)  | - (-,-)              | -0.08 (-0.16, 0.01)  | 0.069    | -0.08 (-0.12, -0.05) | 4.66E-06 |
| A rs10876432 | C12_52018158 | 0.726 | -0.12 (-0.16, -0.07) | 4.00E-07 | -0.04 (-0.12, 0.04)  | -0.04 (-0.13, 0.06)  | -0.04 (-0.10, 0.02)  | 0.19     | -0.09 (-0.13, -0.06) | 9.33E-07 |
| A rs7992970  | C13_41843463 | 0.779 | -0.14 (-0.19, -0.10) | 2.30E-10 | -0.04 (-0.13, 0.04)  | -0.07 (-0.16, 0.03)  | -0.05 (-0.11, 0.00)  | 0.062    | -0.11 (-0.15, -0.08) | 2.71E-10 |
| 4 rs9594738  | C13_41850145 | 0.562 | -0.19 (-0.24, -0.14) | 1.45E-14 | -0.18 (-0.25, -0.11) | -0.09 (-0.17, -0.00) | -0.14 (-0.19, -0.09) | 1.81E-08 | -0.17 (-0.21, -0.14) | 1.96E-21 |
| A rs10507508 | C13_41867782 | 0.947 | -0.18 (-0.26, -0.10) | 0.000012 | -0.15 (-0.31, 0.01)  | -0.15 (-0.35, 0.05)  | -0.15 (-0.26, -0.04) | 0.0092   | -0.17 (-0.24, -0.11) | 3.64E-07 |
| T rs9594759  | C13_41930593 | 0.624 | -0.14 (-0.17, -0.10) | 2.17E-12 | -0.14 (-0.21, -0.07) | -0.07 (-0.15, 0.01)  | -0.11 (-0.16, -0.06) | 9.70E-06 | -0.13 (-0.16, -0.10) | 1.07E-16 |
| A rs3783833  | C14_90505343 | 0.853 | -0.10 (-0.15, -0.05) | 0.000088 | 0.02 (-0.07, 0.11)   | -0.08 (-0.19, 0.02)  | -0.02 (-0.08, 0.04)  | 0.47     | -0.08 (-0.12, -0.04) | 0.00024  |
| A rs1286077  | C14_90516137 | 0.866 | -0.11 (-0.17, -0.06) | 0.000030 | 0.04 (-0.05, 0.13)   | -0.05 (-0.16, 0.06)  | 0.00 (-0.05, 0.05)   | 0.89     | -0.08 (-0.12, -0.03) | 0.00063  |
| C rs884013   | C18_44710128 | 0.925 | -0.08 (-0.15, -0.00) | 0.036    | 0.04 (-0.10, 0.18)   | -0.13 (-0.30, 0.04)  | -0.03 (-0.12, 0.07)  | 0.60     | -0.06 (-0.12, -0.00) | 0.042    |
| C rs713485   | C18_57421905 | 0.331 | -0.09 (-0.13, -0.05) | 2.22E-06 | -0.00 (-0.09, 0.09)  | -0.00 (-0.12, 0.11)  | -0.00 (-0.07, 0.06)  | 0.95     | -0.07 (-0.10, -0.03) | 0.000071 |
| A rs1377172  | C18_57447361 | 0.327 | -0.09 (-0.13, -0.05) | 3.26E-06 | 0.01 (-0.09, 0.11)   | - (-,-)              | 0.01 (-0.08, 0.10)   | 0.82     | -0.08 (-0.12, -0.04) | 0.000017 |
| C rs4507007  | C18_57537499 | 0.123 | -0.12 (-0.17, -0.07) | 0.000016 | -0.03 (-0.13, 0.08)  | -0.05 (-0.18, 0.08)  | -0.04 (-0.11, 0.04)  | 0.34     | -0.09 (-0.14, -0.05) | 0.000034 |
| A rs3018362  | C18_58233073 | 0.354 | -0.07 (-0.11, -0.04) | 0.00014  | -0.03 (-0.10, 0.05)  | -0.07 (-0.15, 0.02)  | -0.04 (-0.09, 0.01)  | 0.097    | -0.06 (-0.09, -0.03) | 0.000044 |
| A rs2232965  | C19_18287950 | 0.198 | -0.06 (-0.11, -0.02) | 0.0068   | -0.03 (-0.12, 0.05)  | 0.07 (-0.04, 0.17)   | 0.00 (-0.04, 0.04)   | 0.86     | -0.04 (-0.08, -0.00) | 0.031    |
| T rs209956   | C20_52156263 | 0.723 | 0.05 (0.01, 0.09)    | 0.020    | -0.02 (-0.10, 0.06)  | -0.02 (-0.11, 0.07)  | -0.02 (-0.07, 0.04)  | 0.50     | 0.03 (-0.01, 0.06)   | 0.12     |
| C rs4810077  | C20_55477509 | 0.351 | -0.07 (-0.11, -0.03) | 0.00034  | -0.00 (-0.08, 0.07)  | 0.08 (-0.01, 0.17)   | 0.03 (-0.02, 0.08)   | 0.25     | -0.04 (-0.07, -0.01) | 0.017    |
| A rs1006899  | C21_14766923 | 0.838 | -0.13 (-0.18, -0.08) | 5.35E-07 | -0.02 (-0.11, 0.07)  | 0.00 (-0.12, 0.12)   | -0.01 (-0.07, 0.05)  | 0.77     | -0.09 (-0.13, -0.05) | 0.000014 |
| T rs2244352  | C21_39679843 | 0.332 | -0.06 (-0.10, -0.03) | 0.0012   | -0.01 (-0.09, 0.06)  | -0.01 (-0.11, 0.09)  | -0.01 (-0.07, 0.04)  | 0.66     | -0.05 (-0.08, -0.02) | 0.0030   |
| C rs9306419  | C22_24699358 | 0.873 | -0.12 (-0.17, -0.06) | 0.000040 | -0.07 (-0.18, 0.05)  | -0.08 (-0.25, 0.09)  | -0.07 (-0.16, 0.02)  | 0.12     | -0.11 (-0.15, -0.06) | 0.000013 |

\* Positions are Build36 coordinates; Allele frequencies are shown and effect on BMD as standard deviations. All P values are two-sided.

Supplementary Table 3B

## Hip BMD association analysis for all SNPs in replication effort

| SNP          | Pos.*        | Freq. | Iceland effect       | P Iceland | Denmark effect       | Australia effect     | DK and AUS combined effect | DK and AUS P value | Overall combined effect | P value  |
|--------------|--------------|-------|----------------------|-----------|----------------------|----------------------|----------------------------|--------------------|-------------------------|----------|
| A rs7524102  | C1_22571034  | 0.817 | -0.15 (-0.20, -0.11) | 7.45E-12  | -0.14 (-0.23, -0.04) | -0.15 (-0.25, -0.04) | -0.14 (-0.20, -0.08)       | 0.000014           | -0.15 (-0.19, -0.11)    | 4.97E-16 |
| G rs6696981  | C1_22575445  | 0.858 | -0.16 (-0.21, -0.11) | 2.79E-10  | -0.12 (-0.23, -0.02) | -0.10 (-0.23, 0.02)  | -0.11 (-0.19, -0.04)       | 0.0023             | -0.14 (-0.19, -0.10)    | 3.82E-12 |
| G rs4516411  | C2_39322180  | 0.070 | -0.09 (-0.16, -0.03) | 0.0064    | 0.00 (-0.16, 0.17)   | 0.06 (-0.08, 0.19)   | 0.02 (-0.05, 0.10)         | 0.55               | -0.06 (-0.12, -0.00)    | 0.049    |
| T rs7595929  | C2_54479744  | 0.360 | 0.04 (0.01, 0.08)    | 0.019     | -0.06 (-0.13, 0.01)  | 0.05 (-0.04, 0.13)   | -0.02 (-0.07, 0.03)        | 0.51               | 0.02 (-0.01, 0.06)      | 0.11     |
| G rs4315567  | C2_54509448  | 0.685 | -0.06 (-0.10, -0.02) | 0.0019    | 0.04 (-0.03, 0.11)   | -0.10 (-0.19, -0.02) | -0.01 (-0.06, 0.03)        | 0.53               | -0.05 (-0.08, -0.02)    | 0.0033   |
| G rs11898505 | C2_54538061  | 0.674 | -0.05 (-0.09, -0.01) | 0.0086    | -0.03 (-0.10, 0.04)  | -0.10 (-0.18, -0.01) | -0.05 (-0.10, 0.01)        | 0.029              | -0.04 (-0.07, -0.01)    | 0.00069  |
| A rs10497621 | C2_183705688 | 0.913 | -0.11 (-0.17, -0.05) | 0.00024   | 0.05 (-0.08, 0.17)   | -0.11 (-0.28, 0.05)  | -0.01 (-0.11, 0.08)        | 0.80               | -0.08 (-0.13, -0.03)    | 0.0013   |
| C rs10510248 | C3_3023519   | 0.233 | -0.06 (-0.10, -0.02) | 0.0015    | -0.02 (-0.10, 0.06)  | 0.03 (-0.09, 0.15)   | -0.00 (-0.05, 0.05)        | 0.94               | -0.05 (-0.08, -0.01)    | 0.0060   |
| C rs2872375  | C3_78378354  | 0.683 | -0.03 (-0.06, 0.01)  | 0.17      | 0.00 (-0.07, 0.07)   | 0.03 (-0.06, 0.11)   | 0.01 (-0.04, 0.06)         | 0.69               | -0.01 (-0.05, 0.02)     | 0.36     |
| T rs1398330  | C3_78405572  | 0.233 | 0.03 (-0.01, 0.07)   | 0.14      | 0.01 (-0.07, 0.09)   | -0.01 (-0.11, 0.09)  | 0.00 (-0.05, 0.06)         | 0.96               | 0.02 (-0.01, 0.06)      | 0.21     |
| T rs1350929  | C3_111951197 | 0.443 | -0.00 (-0.04, 0.03)  | 0.96      | 0.04 (-0.03, 0.10)   | 0.04 (-0.04, 0.12)   | 0.04 (-0.01, 0.08)         | 0.11               | 0.01 (-0.01, 0.04)      | 0.41     |
| T rs3851406  | C3_169807659 | 0.907 | -0.07 (-0.13, -0.01) | 0.029     | -0.01 (-0.12, 0.09)  | 0.11 (-0.03, 0.24)   | 0.04 (-0.04, 0.11)         | 0.38               | -0.04 (-0.09, 0.02)     | 0.18     |
| C rs4692511  | C4_30973757  | 0.853 | -0.10 (-0.15, -0.05) | 0.000057  | -0.03 (-0.13, 0.07)  | -0.04 (-0.15, 0.08)  | -0.03 (-0.10, 0.04)        | 0.36               | -0.08 (-0.12, -0.04)    | 0.00011  |
| G rs7676236  | C4_102793390 | 0.323 | -0.07 (-0.10, -0.03) | 0.00033   | -0.00 (-0.08, 0.07)  | -0.02 (-0.11, 0.07)  | -0.01 (-0.06, 0.04)        | 0.67               | -0.05 (-0.08, -0.02)    | 0.0012   |
| T rs2043644  | C4_148959669 | 0.086 | -0.10 (-0.16, -0.04) | 0.0016    | 0.00 (-0.11, 0.11)   | 0.13 (-0.04, 0.30)   | 0.05 (-0.05, 0.14)         | 0.33               | -0.06 (-0.11, -0.01)    | 0.025    |
| C rs1265159  | C6_31248026  | 0.803 | -0.07 (-0.11, -0.03) | 0.0015    | -0.08 (-0.16, 0.00)  | -0.01 (-0.10, 0.09)  | -0.05 (-0.11, 0.01)        | 0.082              | -0.06 (-0.10, -0.03)    | 0.00031  |
| A rs3132453  | C6_31712023  | 0.106 | -0.07 (-0.12, -0.02) | 0.011     | 0.00 (-0.12, 0.13)   | -0.06 (-0.19, 0.08)  | -0.02 (-0.10, 0.06)        | 0.59               | -0.06 (-0.10, -0.01)    | 0.016    |
| G rs12198173 | C6_32134786  | 0.922 | -0.08 (-0.15, -0.02) | 0.015     | -0.08 (-0.21, 0.05)  | 0.05 (-0.13, 0.24)   | -0.04 (-0.14, 0.06)        | 0.47               | -0.07 (-0.13, -0.01)    | 0.014    |
| C rs13199524 | C6_32174743  | 0.922 | -0.09 (-0.15, -0.02) | 0.011     | -0.07 (-0.20, 0.06)  | 0.03 (-0.13, 0.18)   | -0.03 (-0.13, 0.06)        | 0.50               | -0.07 (-0.13, -0.02)    | 0.012    |
| T rs3130340  | C6_32352605  | 0.787 | -0.06 (-0.10, -0.01) | 0.010     | -0.06 (-0.14, 0.02)  | 0.01 (-0.09, 0.11)   | -0.03 (-0.09, 0.03)        | 0.30               | -0.05 (-0.08, -0.01)    | 0.0065   |
| T rs6899351  | C6_123150805 | 0.699 | 0.04 (0.01, 0.08)    | 0.019     | -0.06 (-0.13, 0.02)  | -0.04 (-0.13, 0.05)  | -0.05 (-0.10, 0.00)        | 0.060              | 0.02 (-0.02, 0.05)      | 0.35     |
| C rs9479055  | C6_151889660 | 0.348 | -0.09 (-0.12, -0.05) | 1.74E-06  | -0.06 (-0.13, 0.01)  | -0.08 (-0.17, -0.00) | -0.07 (-0.12, -0.02)       | 0.0050             | -0.08 (-0.11, -0.05)    | 3.05E-08 |
| T rs4463269  | C6_151903921 | 0.245 | -0.09 (-0.13, -0.05) | 0.000022  | -0.03 (-0.10, 0.05)  | -0.13 (-0.21, -0.04) | -0.07 (-0.12, -0.02)       | 0.0095             | -0.08 (-0.11, -0.05)    | 6.76E-07 |
| A rs3734803  | C6_151911338 | 0.158 | -0.09 (-0.13, -0.04) | 0.00027   | -0.11 (-0.20, -0.02) | -0.07 (-0.17, 0.03)  | -0.09 (-0.16, -0.03)       | 0.0032             | -0.09 (-0.13, -0.05)    | 3.16E-06 |
| T rs4869738  | C6_151933844 | 0.181 | -0.09 (-0.13, -0.05) | 0.000053  | -0.00 (-0.08, 0.08)  | -0.15 (-0.25, -0.06) | -0.06 (-0.12, -0.01)       | 0.030              | -0.08 (-0.12, -0.05)    | 4.74E-06 |
| T rs4870044  | C6_151943102 | 0.281 | -0.08 (-0.12, -0.05) | 0.000014  | -0.11 (-0.19, -0.04) | -0.03 (-0.11, 0.06)  | -0.08 (-0.13, -0.03)       | 0.0032             | -0.08 (-0.11, -0.05)    | 1.56E-07 |
| G rs1038304  | C6_151974868 | 0.469 | -0.11 (-0.14, -0.07) | 6.72E-10  | -0.04 (-0.11, 0.02)  | -0.01 (-0.09, 0.07)  | -0.03 (-0.08, 0.02)        | 0.21               | -0.08 (-0.11, -0.06)    | 5.26E-09 |
| A rs6929137  | C6_151978370 | 0.298 | -0.10 (-0.14, -0.07) | 3.05E-08  | -0.04 (-0.11, 0.03)  | -0.02 (-0.11, 0.06)  | -0.03 (-0.08, 0.02)        | 0.20               | -0.08 (-0.11, -0.05)    | 1.03E-07 |
| A rs7751941  | C6_151988351 | 0.214 | -0.11 (-0.15, -0.06) | 5.18E-07  | -0.07 (-0.15, 0.01)  | -0.01 (-0.11, 0.09)  | -0.05 (-0.11, 0.01)        | 0.085              | -0.09 (-0.12, -0.06)    | 2.67E-07 |
| A rs852003   | C6_152003895 | 0.560 | -0.10 (-0.13, -0.06) | 2.63E-08  | -0.02 (-0.08, 0.05)  | 0.02 (-0.06, 0.10)   | -0.00 (-0.05, 0.05)        | 0.94               | -0.07 (-0.10, -0.04)    | 2.59E-06 |
| G rs712219   | C6_152020132 | 0.597 | -0.10 (-0.14, -0.07) | 7.87E-09  | -0.01 (-0.08, 0.06)  | 0.01 (-0.07, 0.10)   | 0.00 (-0.01, 0.01)         | 1.00               | -0.07 (-0.10, -0.04)    | 1.04E-06 |
| T rs851993   | C6_152047704 | 0.612 | -0.09 (-0.13, -0.06) | 2.22E-07  | -0.02 (-0.08, 0.05)  | 0.02 (-0.06, 0.11)   | -0.00 (-0.05, 0.05)        | 0.98               | -0.06 (-0.09, -0.04)    | 0.000014 |
| C rs3020331  | C6_152050473 | 0.555 | -0.11 (-0.15, -0.08) | 3.79E-11  | -0.01 (-0.08, 0.06)  | -0.00 (-0.09, 0.09)  | -0.01 (-0.06, 0.04)        | 0.73               | -0.08 (-0.11, -0.05)    | 1.06E-08 |
| T rs851982   | C6_152066678 | 0.602 | -0.11 (-0.15, -0.08) | 8.81E-11  | -0.01 (-0.08, 0.06)  | -0.01 (-0.09, 0.08)  | -0.01 (-0.06, 0.04)        | 0.72               | -0.08 (-0.11, -0.05)    | 2.10E-08 |
| G rs1159327  | C6_152089715 | 0.714 | -0.07 (-0.11, -0.04) | 0.00014   | 0.03 (-0.04, 0.11)   | 0.00 (-0.08, 0.08)   | 0.02 (-0.04, 0.07)         | 0.50               | -0.05 (-0.08, -0.01)    | 0.0051   |
| C rs1999805  | C6_152110057 | 0.437 | -0.07 (-0.11, -0.04) | 0.000048  | -0.01 (-0.08, 0.06)  | -0.03 (-0.12, 0.06)  | -0.02 (-0.07, 0.03)        | 0.45               | -0.06 (-0.09, -0.03)    | 0.00012  |
| T rs2504070  | C6_152126666 | 0.316 | -0.04 (-0.07, 0.00)  | 0.061     | 0.02 (-0.06, 0.09)   | -0.01 (-0.10, 0.08)  | 0.01 (-0.05, 0.06)         | 0.80               | -0.02 (-0.05, 0.01)     | 0.15     |

|              |              |       |                      |          |                      |                      |                      |         |                      |          |
|--------------|--------------|-------|----------------------|----------|----------------------|----------------------|----------------------|---------|----------------------|----------|
| A rs2504063  | C6_152132400 | 0.381 | -0.07 (-0.11, -0.04) | 0.000046 | -0.03 (-0.10, 0.04)  | -0.02 (-0.10, 0.06)  | -0.02 (-0.07, 0.02)  | 0.32    | -0.06 (-0.09, -0.03) | 0.000079 |
| G rs2504065  | C6_152136860 | 0.489 | -0.06 (-0.09, -0.02) | 0.00078  | -0.01 (-0.08, 0.06)  | -0.04 (-0.12, 0.04)  | -0.02 (-0.07, 0.03)  | 0.39    | -0.05 (-0.07, -0.02) | 0.0010   |
| G rs10505328 | C8_119219639 | 0.494 | 0.04 (0.00, 0.07)    | 0.042    | -0.02 (-0.09, 0.05)  | -0.08 (-0.17, 0.01)  | -0.04 (-0.09, 0.01)  | 0.10    | 0.01 (-0.02, 0.05)   | 0.40     |
| A rs6469804  | C8_120114010 | 0.510 | -0.09 (-0.13, -0.06) | 1.99E-07 | -0.06 (-0.12, 0.00)  | -0.08 (-0.16, -0.00) | -0.07 (-0.12, -0.02) | 0.0032  | -0.08 (-0.11, -0.06) | 2.45E-09 |
| C rs6993813  | C8_120121419 | 0.496 | -0.10 (-0.13, -0.06) | 2.06E-08 | -0.09 (-0.15, -0.02) | -0.08 (-0.17, 0.00)  | -0.09 (-0.13, -0.04) | 0.00039 | -0.09 (-0.12, -0.07) | 3.29E-11 |
| A rs10125592 | C9_122201556 | 0.851 | -0.07 (-0.12, -0.03) | 0.0024   | 0.03 (-0.15, 0.20)   | -0.01 (-0.13, 0.11)  | 0.00 (-0.15, 0.15)   | 0.99    | -0.06 (-0.10, -0.02) | 0.0064   |
| C rs3780674  | C9_122206740 | 0.851 | -0.08 (-0.12, -0.03) | 0.0016   | -0.00 (-0.10, 0.10)  | -0.03 (-0.14, 0.09)  | -0.01 (-0.08, 0.05)  | 0.70    | -0.06 (-0.10, -0.02) | 0.0043   |
| C rs7028896  | C9_132521981 | 0.937 | -0.09 (-0.16, -0.02) | 0.0089   | -0.08 (-0.20, 0.04)  | -0.10 (-0.24, 0.04)  | -0.09 (-0.17, -0.01) | 0.034   | -0.09 (-0.14, -0.04) | 0.00080  |
| A rs7024345  | C9_99635059  | 0.284 | -0.09 (-0.13, -0.05) | 3.04E-06 | -0.02 (-0.10, 0.06)  | 0.00 (-0.10, 0.11)   | -0.01 (-0.07, 0.04)  | 0.65    | -0.07 (-0.10, -0.04) | 0.000032 |
| C rs11246386 | C11_1034938  | 0.768 | -0.07 (-0.11, -0.03) | 0.0011   | 0.04 (-0.04, 0.12)   | 0.01 (-0.09, 0.11)   | 0.03 (-0.03, 0.08)   | 0.32    | -0.04 (-0.08, -0.00) | 0.026    |
| C rs5896     | C11_46701579 | 0.849 | -0.09 (-0.13, -0.04) | 0.00051  | -0.05 (-0.15, 0.04)  | -0.02 (-0.15, 0.10)  | -0.04 (-0.11, 0.03)  | 0.25    | -0.07 (-0.11, -0.03) | 0.00039  |
| G rs2306033  | C11_46854022 | 0.854 | -0.10 (-0.15, -0.05) | 0.000092 | -0.04 (-0.13, 0.06)  | -0.09 (-0.21, 0.03)  | -0.06 (-0.12, 0.01)  | 0.11    | -0.08 (-0.12, -0.04) | 0.000034 |
| C rs11039024 | C11_46879744 | 0.841 | -0.07 (-0.12, -0.03) | 0.0019   | -0.01 (-0.10, 0.08)  | -0.03 (-0.15, 0.09)  | -0.02 (-0.08, 0.05)  | 0.61    | -0.06 (-0.10, -0.02) | 0.0040   |
| A rs10838635 | C11_46901803 | 0.760 | -0.07 (-0.11, -0.03) | 0.00043  | -0.03 (-0.10, 0.05)  | -0.04 (-0.14, 0.05)  | -0.03 (-0.09, 0.02)  | 0.26    | -0.06 (-0.09, -0.03) | 0.00038  |
| T rs11600292 | C11_46915274 | 0.760 | -0.07 (-0.11, -0.03) | 0.0012   | -0.05 (-0.12, 0.03)  | -0.05 (-0.14, 0.05)  | -0.05 (-0.10, 0.01)  | 0.11    | -0.06 (-0.09, -0.03) | 0.00032  |
| G rs7935346  | C11_46964955 | 0.769 | -0.06 (-0.10, -0.02) | 0.0027   | -0.06 (-0.14, 0.02)  | -0.06 (-0.16, 0.04)  | -0.06 (-0.12, -0.00) | 0.036   | -0.06 (-0.10, -0.03) | 0.00026  |
| A rs7121418  | C11_47121682 | 0.651 | -0.04 (-0.08, -0.01) | 0.020    | -0.07 (-0.14, -0.00) | -0.02 (-0.10, 0.07)  | -0.05 (-0.10, -0.00) | 0.042   | -0.05 (-0.07, -0.02) | 0.0022   |
| G rs2279439  | C11_47153558 | 0.754 | -0.05 (-0.09, -0.01) | 0.011    | -0.06 (-0.14, 0.02)  | -0.06 (-0.16, 0.04)  | -0.06 (-0.11, 0.00)  | 0.059   | -0.05 (-0.09, -0.02) | 0.0016   |
| A rs2016266  | C12_52014222 | 0.685 | -0.04 (-0.08, -0.01) | 0.021    | -0.05 (-0.14, 0.03)  | - (-,-)              | -0.05 (-0.13, 0.03)  | 0.21    | -0.04 (-0.08, -0.01) | 0.0088   |
| A rs10876432 | C12_52018158 | 0.726 | -0.06 (-0.10, -0.02) | 0.0053   | -0.05 (-0.13, 0.03)  | -0.01 (-0.11, 0.10)  | -0.03 (-0.09, 0.03)  | 0.27    | -0.05 (-0.08, -0.02) | 0.0035   |
| A rs7992970  | C13_41843463 | 0.779 | -0.10 (-0.14, -0.05) | 4.83E-06 | -0.04 (-0.11, 0.04)  | -0.03 (-0.12, 0.07)  | -0.03 (-0.09, 0.02)  | 0.25    | -0.08 (-0.11, -0.04) | 8.17E-06 |
| T rs9594738  | C13_41850145 | 0.562 | -0.14 (-0.18, -0.09) | 8.24E-09 | -0.08 (-0.15, -0.01) | 0.00 (-0.10, 0.11)   | -0.05 (-0.10, 0.00)  | 0.063   | -0.10 (-0.13, -0.06) | 1.94E-08 |
| A rs10507508 | C13_41867782 | 0.947 | -0.13 (-0.20, -0.05) | 0.0011   | -0.08 (-0.23, 0.08)  | -0.23 (-0.42, -0.03) | -0.14 (-0.25, -0.03) | 0.016   | -0.13 (-0.19, -0.07) | 0.000053 |
| T rs9594759  | C13_41930593 | 0.624 | -0.09 (-0.12, -0.05) | 1.64E-06 | -0.07 (-0.14, -0.01) | 0.03 (-0.05, 0.11)   | -0.03 (-0.08, 0.02)  | 0.17    | -0.07 (-0.10, -0.04) | 2.07E-06 |
| A rs3783833  | C14_90505343 | 0.853 | -0.09 (-0.14, -0.04) | 0.00028  | 0.02 (-0.06, 0.11)   | -0.05 (-0.15, 0.06)  | -0.01 (-0.07, 0.06)  | 0.86    | -0.06 (-0.10, -0.02) | 0.0017   |
| A rs1286077  | C14_90516137 | 0.866 | -0.09 (-0.14, -0.04) | 0.00031  | 0.05 (-0.03, 0.14)   | -0.02 (-0.13, 0.10)  | 0.03 (-0.04, 0.09)   | 0.41    | -0.06 (-0.10, -0.01) | 0.0099   |
| C rs884013   | C18_44710128 | 0.925 | -0.12 (-0.19, -0.06) | 0.00024  | 0.01 (-0.13, 0.15)   | -0.20 (-0.37, -0.03) | -0.07 (-0.17, 0.02)  | 0.14    | -0.11 (-0.16, -0.05) | 0.00010  |
| C rs713485   | C18_57421905 | 0.331 | -0.07 (-0.10, -0.03) | 0.00034  | 0.01 (-0.06, 0.09)   | 0.00 (-0.09, 0.10)   | 0.01 (-0.04, 0.06)   | 0.68    | -0.04 (-0.07, -0.01) | 0.0057   |
| A rs1377172  | C18_57447361 | 0.327 | -0.06 (-0.10, -0.03) | 0.00078  | -0.01 (-0.11, 0.09)  | - (-,-)              | -0.01 (-0.10, 0.08)  | 0.79    | -0.06 (-0.09, -0.02) | 0.0011   |
| C rs4507007  | C18_57537499 | 0.123 | -0.12 (-0.17, -0.07) | 6.69E-06 | 0.00 (-0.11, 0.11)   | 0.11 (-0.02, 0.24)   | 0.04 (-0.03, 0.12)   | 0.23    | -0.07 (-0.11, -0.03) | 0.0016   |
| A rs3018362  | C18_58233073 | 0.354 | -0.08 (-0.11, -0.04) | 0.000024 | -0.08 (-0.15, -0.01) | -0.03 (-0.12, 0.05)  | -0.06 (-0.11, -0.01) | 0.013   | -0.07 (-0.10, -0.04) | 9.85E-07 |
| A rs2232965  | C19_18287950 | 0.198 | -0.09 (-0.14, -0.05) | 0.000016 | -0.04 (-0.12, 0.04)  | -0.00 (-0.12, 0.11)  | -0.03 (-0.09, 0.04)  | 0.41    | -0.07 (-0.11, -0.04) | 0.000049 |
| C rs209956   | C20_52156263 | 0.277 | -0.07 (-0.11, -0.03) | 0.00025  | 0.03 (-0.04, 0.11)   | 0.04 (-0.05, 0.13)   | 0.04 (-0.02, 0.09)   | 0.19    | -0.04 (-0.07, -0.01) | 0.019    |
| T rs4810077  | C20_55477509 | 0.649 | 0.04 (0.01, 0.08)    | 0.022    | -0.02 (-0.09, 0.05)  | -0.07 (-0.15, 0.01)  | -0.04 (-0.09, 0.01)  | 0.14    | 0.02 (-0.01, 0.05)   | 0.25     |
| A rs1006899  | C21_14766923 | 0.838 | -0.06 (-0.11, -0.01) | 0.0099   | 0.00 (-0.09, 0.09)   | 0.02 (-0.09, 0.12)   | 0.01 (-0.05, 0.07)   | 0.78    | -0.04 (-0.08, -0.00) | 0.045    |
| T rs2244352  | C21_39679843 | 0.332 | -0.02 (-0.06, 0.01)  | 0.22     | -0.03 (-0.10, 0.04)  | -0.00 (-0.08, 0.08)  | -0.02 (-0.08, 0.04)  | 0.48    | -0.02 (-0.05, 0.01)  | 0.16     |
| C rs9306419  | C22_24699358 | 0.873 | -0.11 (-0.16, -0.06) | 0.000053 | -0.08 (-0.19, 0.04)  | -0.05 (-0.22, 0.11)  | -0.07 (-0.16, 0.02)  | 0.11    | -0.10 (-0.14, -0.05) | 0.000016 |

\* Positions are Build36 coordinates; Allele frequencies are shown and effect on BMD as standard deviations. All P values are two-sided.

Supplementary Table 4

## SNP association by gender (for overall combined analysis)

| SNP          | Position     | Freq* | HipFemale effect     | P value | HipMale effect       | P value | SpineFemale effect   | P value | SpineMale effect     | P value |
|--------------|--------------|-------|----------------------|---------|----------------------|---------|----------------------|---------|----------------------|---------|
| A rs7524102  | C1_22571034  | 0.817 | -0.16 (-0.20, -0.12) | 1.4E-15 | -0.10 (-0.18, -0.01) | 0.034   | -0.12 (-0.16, -0.07) | 6.6E-08 | -0.10 (-0.19, -0.00) | 0.043   |
| G rs6696981  | C1_22575445  | 0.858 | -0.16 (-0.20, -0.11) | 5.6E-12 | -0.09 (-0.19, 0.01)  | 0.083   | -0.12 (-0.16, -0.07) | 1.2E-06 | -0.11 (-0.23, 0.00)  | 0.056   |
| T rs4516411  | C2_39322180  | 0.930 | 0.07 (0.01, 0.14)    | 0.029   | 0.01 (-0.11, 0.13)   | 0.89    | 0.05 (-0.01, 0.12)   | 0.100   | -0.07 (-0.22, 0.07)  | 0.33    |
| C rs7595929  | C2_54479744  | 0.640 | -0.01 (-0.05, 0.03)  | 0.64    | -0.10 (-0.17, -0.03) | 0.004   | -0.05 (-0.09, -0.02) | 0.0040  | -0.08 (-0.16, 0.01)  | 0.078   |
| G rs4315567  | C2_54509448  | 0.685 | -0.03 (-0.07, 0.00)  | 0.074   | -0.11 (-0.18, -0.04) | 0.002   | -0.06 (-0.09, -0.02) | 0.0019  | -0.11 (-0.19, -0.02) | 0.016   |
| G rs11898505 | C2_54538061  | 0.674 | -0.03 (-0.06, 0.00)  | 0.082   | -0.09 (-0.17, -0.02) | 0.010   | -0.07 (-0.10, -0.03) | 0.00018 | -0.11 (-0.20, -0.02) | 0.012   |
| G rs10497621 | C2_183705688 | 0.087 | 0.10 (0.04, 0.15)    | 0.00041 | 0.00 (-0.12, 0.13)   | 0.94    | 0.06 (0.00, 0.12)    | 0.038   | -0.01 (-0.16, 0.14)  | 0.87    |
| T rs10510248 | C3_3023519   | 0.767 | 0.05 (0.02, 0.09)    | 0.0035  | 0.01 (-0.06, 0.08)   | 0.82    | 0.01 (-0.03, 0.05)   | 0.69    | -0.01 (-0.10, 0.08)  | 0.83    |
| C rs2872375  | C3_78378354  | 0.683 | -0.02 (-0.05, 0.01)  | 0.24    | 0.01 (-0.07, 0.09)   | 0.77    | -0.07 (-0.10, -0.03) | 0.00017 | -0.03 (-0.12, 0.06)  | 0.50    |
| G rs1398330  | C3_78405572  | 0.767 | -0.02 (-0.06, 0.01)  | 0.23    | -0.01 (-0.09, 0.06)  | 0.69    | -0.08 (-0.11, -0.04) | 8.6E-05 | -0.07 (-0.17, 0.02)  | 0.12    |
| G rs1350929  | C3_111951197 | 0.557 | -0.01 (-0.04, 0.02)  | 0.64    | -0.03 (-0.09, 0.03)  | 0.33    | -0.05 (-0.08, -0.02) | 0.0025  | 0.00 (-0.12, 0.13)   | 0.97    |
| T rs3851406  | C3_169807659 | 0.907 | -0.03 (-0.09, 0.02)  | 0.28    | -0.06 (-0.20, 0.08)  | 0.40    | -0.08 (-0.14, -0.03) | 0.0032  | -0.12 (-0.26, 0.02)  | 0.084   |
| T rs4692511  | C4_30973757  | 0.147 | 0.08 (0.04, 0.13)    | 0.00023 | 0.06 (-0.04, 0.16)   | 0.21    | 0.06 (0.01, 0.10)    | 0.015   | -0.04 (-0.15, 0.07)  | 0.46    |
| G rs7676236  | C4_102793390 | 0.323 | -0.05 (-0.08, -0.02) | 0.0041  | -0.06 (-0.13, 0.01)  | 0.12    | -0.04 (-0.07, -0.00) | 0.035   | -0.07 (-0.15, 0.01)  | 0.092   |
| T rs2043644  | C4_148959669 | 0.086 | -0.07 (-0.13, -0.01) | 0.015   | -0.00 (-0.01, 0.01)  | 0.98    | -0.06 (-0.12, -0.00) | 0.043   | -0.06 (-0.22, 0.11)  | 0.52    |
| C rs1265159  | C6_31248026  | 0.803 | -0.07 (-0.11, -0.03) | 0.00030 | -0.04 (-0.12, 0.05)  | 0.39    | -0.06 (-0.10, -0.02) | 0.0029  | -0.09 (-0.19, 0.01)  | 0.085   |
| A rs3132453  | C6_31712023  | 0.106 | -0.05 (-0.10, -0.00) | 0.031   | -0.06 (-0.17, 0.05)  | 0.30    | -0.07 (-0.12, -0.01) | 0.013   | -0.06 (-0.19, 0.06)  | 0.33    |
| G rs12198173 | C6_32134786  | 0.922 | -0.09 (-0.15, -0.03) | 0.0054  | 0.01 (-0.08, 0.09)   | 0.88    | -0.09 (-0.15, -0.02) | 0.0065  | -0.10 (-0.24, 0.04)  | 0.16    |
| C rs13199524 | C6_32174743  | 0.922 | -0.09 (-0.15, -0.03) | 0.0047  | 0.00 (-0.03, 0.04)   | 0.93    | -0.09 (-0.15, -0.03) | 0.0038  | -0.10 (-0.24, 0.03)  | 0.14    |
| T rs3130340  | C6_32352605  | 0.787 | -0.05 (-0.09, -0.02) | 0.0049  | -0.02 (-0.12, 0.08)  | 0.65    | -0.10 (-0.14, -0.07) | 1.2E-07 | -0.06 (-0.16, 0.04)  | 0.26    |
| T rs6899351  | C6_123150805 | 0.699 | 0.02 (-0.02, 0.05)   | 0.38    | 0.01 (-0.06, 0.08)   | 0.74    | 0.02 (-0.01, 0.06)   | 0.22    | 0.02 (-0.06, 0.11)   | 0.61    |
| C rs9479055  | C6_151889660 | 0.348 | -0.07 (-0.10, -0.04) | 6.2E-06 | -0.12 (-0.19, -0.05) | 0.00075 | -0.08 (-0.11, -0.04) | 3.5E-06 | -0.08 (-0.15, -0.00) | 0.046   |
| T rs4463269  | C6_151903921 | 0.245 | -0.07 (-0.10, -0.03) | 0.00015 | -0.14 (-0.22, -0.06) | 0.00034 | -0.06 (-0.09, -0.02) | 0.00095 | -0.10 (-0.18, -0.03) | 0.0085  |
| A rs3734803  | C6_151911338 | 0.158 | -0.08 (-0.12, -0.03) | 0.00032 | -0.15 (-0.24, -0.06) | 0.00110 | -0.09 (-0.13, -0.05) | 3.2E-05 | -0.11 (-0.20, -0.02) | 0.021   |
| T rs4869738  | C6_151933844 | 0.181 | -0.06 (-0.10, -0.03) | 0.0011  | -0.16 (-0.24, -0.08) | 0.00014 | -0.07 (-0.11, -0.03) | 0.00101 | -0.15 (-0.24, -0.06) | 0.00084 |
| T rs4870044  | C6_151943102 | 0.281 | -0.07 (-0.11, -0.04) | 3.9E-05 | -0.14 (-0.21, -0.06) | 0.00042 | -0.11 (-0.14, -0.07) | 2.4E-09 | -0.13 (-0.21, -0.05) | 0.0016  |
| G rs1038304  | C6_151974868 | 0.469 | -0.07 (-0.11, -0.04) | 1.9E-06 | -0.13 (-0.20, -0.06) | 0.00025 | -0.09 (-0.12, -0.06) | 6.9E-08 | -0.16 (-0.24, -0.08) | 7.9E-05 |
| A rs6929137  | C6_151978370 | 0.298 | -0.07 (-0.10, -0.04) | 2.3E-05 | -0.14 (-0.21, -0.06) | 0.00032 | -0.09 (-0.13, -0.06) | 1.1E-07 | -0.14 (-0.22, -0.06) | 0.0010  |
| A rs7751941  | C6_151988351 | 0.214 | -0.08 (-0.12, -0.04) | 1.5E-05 | -0.13 (-0.21, -0.04) | 0.004   | -0.09 (-0.13, -0.05) | 2.3E-06 | -0.14 (-0.23, -0.04) | 0.0046  |
| A rs852003   | C6_152003895 | 0.560 | -0.06 (-0.09, -0.03) | 0.00028 | -0.12 (-0.20, -0.05) | 0.00087 | -0.07 (-0.10, -0.04) | 4.0E-05 | -0.12 (-0.20, -0.04) | 0.0024  |
| G rs712219   | C6_152020132 | 0.597 | -0.07 (-0.10, -0.04) | 4.0E-05 | -0.10 (-0.18, -0.03) | 0.007   | -0.07 (-0.10, -0.04) | 3.2E-05 | -0.11 (-0.19, -0.03) | 0.0084  |
| T rs851993   | C6_152047704 | 0.612 | -0.05 (-0.09, -0.02) | 0.00067 | -0.11 (-0.19, -0.04) | 0.003   | -0.06 (-0.10, -0.03) | 0.00020 | -0.09 (-0.17, -0.01) | 0.030   |
| C rs3020331  | C6_152050473 | 0.555 | -0.08 (-0.11, -0.05) | 1.1E-06 | -0.11 (-0.19, -0.04) | 0.002   | -0.08 (-0.12, -0.05) | 3.6E-07 | -0.11 (-0.19, -0.03) | 0.0066  |
| T rs851982   | C6_152066678 | 0.602 | -0.08 (-0.11, -0.05) | 6.4E-07 | -0.10 (-0.17, -0.02) | 0.010   | -0.08 (-0.12, -0.05) | 4.3E-07 | -0.11 (-0.20, -0.03) | 0.0084  |
| G rs1159327  | C6_152089715 | 0.714 | -0.05 (-0.08, -0.02) | 0.0046  | -0.02 (-0.10, 0.06)  | 0.59    | -0.07 (-0.10, -0.03) | 0.00034 | -0.02 (-0.11, 0.06)  | 0.57    |
| C rs1999805  | C6_152110057 | 0.437 | -0.05 (-0.08, -0.02) | 0.0018  | -0.09 (-0.16, -0.02) | 0.015   | -0.08 (-0.11, -0.05) | 6.6E-07 | -0.11 (-0.18, -0.03) | 0.0086  |
| T rs2504070  | C6_152126666 | 0.316 | -0.03 (-0.06, 0.01)  | 0.13    | -0.01 (-0.07, 0.06)  | 0.85    | -0.06 (-0.10, -0.03) | 0.00083 | -0.01 (-0.12, 0.10)  | 0.84    |
| A rs2504063  | C6_152132400 | 0.381 | -0.07 (-0.10, -0.04) | 1.7E-05 | -0.01 (-0.07, 0.06)  | 0.82    | -0.09 (-0.12, -0.06) | 4.7E-08 | -0.08 (-0.16, -0.00) | 0.048   |
| G rs2504065  | C6_152136860 | 0.489 | -0.05 (-0.08, -0.02) | 0.0012  | -0.03 (-0.10, 0.04)  | 0.37    | -0.07 (-0.10, -0.04) | 2.0E-05 | -0.11 (-0.18, -0.03) | 0.0057  |

|              |              |       |                      |          |                      |         |                      |         |                      |         |
|--------------|--------------|-------|----------------------|----------|----------------------|---------|----------------------|---------|----------------------|---------|
| A rs10505328 | C8_119219639 | 0.506 | -0.01 (-0.05, 0.02)  | 0.39     | -0.01 (-0.12, 0.10)  | 0.86    | -0.04 (-0.07, -0.01) | 0.023   | -0.12 (-0.20, -0.04) | 0.0043  |
| A rs6469804  | C8_120114010 | 0.510 | -0.07 (-0.10, -0.04) | 2.8E-06  | -0.14 (-0.21, -0.07) | 4.3E-05 | -0.10 (-0.13, -0.07) | 5.8E-10 | -0.19 (-0.26, -0.11) | 9.0E-07 |
| C rs6993813  | C8_120121419 | 0.496 | -0.08 (-0.11, -0.05) | 9.9E-08  | -0.15 (-0.22, -0.08) | 2.0E-05 | -0.10 (-0.13, -0.07) | 7.3E-10 | -0.19 (-0.27, -0.11) | 2.1E-06 |
| G rs7024345  | C9_99635059  | 0.716 | 0.07 (0.03, 0.10)    | 0.00010  | 0.06 (-0.02, 0.14)   | 0.13    | 0.02 (-0.02, 0.05)   | 0.28    | 0.03 (-0.06, 0.11)   | 0.55    |
| A rs10125592 | C9_122201556 | 0.851 | -0.06 (-0.11, -0.01) | 0.017    | -0.07 (-0.17, 0.03)  | 0.19    | -0.10 (-0.14, -0.05) | 0.00011 | -0.08 (-0.20, 0.03)  | 0.15    |
| C rs3780674  | C9_122206740 | 0.851 | -0.06 (-0.10, -0.01) | 0.011    | -0.07 (-0.17, 0.03)  | 0.20    | -0.08 (-0.13, -0.04) | 0.00029 | -0.08 (-0.19, 0.04)  | 0.18    |
| C rs7028896  | C9_132521981 | 0.937 | -0.10 (-0.15, -0.04) | 0.0016   | -0.07 (-0.19, 0.06)  | 0.29    | -0.10 (-0.17, -0.03) | 0.0031  | -0.09 (-0.21, 0.03)  | 0.12    |
| C rs11246386 | C11_1034938  | 0.768 | -0.03 (-0.07, 0.01)  | 0.096    | -0.08 (-0.17, 0.01)  | 0.089   | -0.06 (-0.10, -0.02) | 0.0036  | -0.19 (-0.28, -0.10) | 5.6E-05 |
| T rs5896     | C11_46701579 | 0.151 | 0.08 (0.04, 0.13)    | 0.00024  | 0.03 (-0.08, 0.14)   | 0.59    | 0.01 (-0.04, 0.06)   | 0.64    | 0.02 (-0.08, 0.12)   | 0.67    |
| G rs2306033  | C11_46854022 | 0.854 | -0.08 (-0.13, -0.04) | 0.00020  | -0.09 (-0.20, 0.01)  | 0.068   | -0.02 (-0.06, 0.03)  | 0.43    | -0.06 (-0.17, 0.04)  | 0.26    |
| T rs11039024 | C11_46879744 | 0.159 | 0.06 (0.02, 0.10)    | 0.0047   | 0.04 (-0.06, 0.14)   | 0.45    | 0.00 (-0.04, 0.04)   | 0.97    | 0.03 (-0.07, 0.13)   | 0.52    |
| G rs10838635 | C11_46901803 | 0.240 | 0.06 (0.02, 0.10)    | 0.00094  | 0.06 (-0.03, 0.14)   | 0.18    | 0.03 (-0.01, 0.07)   | 0.10    | 0.02 (-0.05, 0.08)   | 0.59    |
| T rs11600292 | C11_46915274 | 0.760 | -0.06 (-0.10, -0.03) | 0.00052  | -0.05 (-0.13, 0.04)  | 0.28    | -0.03 (-0.07, 0.01)  | 0.15    | -0.01 (-0.08, 0.05)  | 0.65    |
| G rs7935346  | C11_46964955 | 0.769 | -0.06 (-0.10, -0.03) | 0.00066  | -0.06 (-0.15, 0.03)  | 0.18    | -0.03 (-0.07, 0.01)  | 0.11    | -0.02 (-0.10, 0.06)  | 0.62    |
| G rs7121418  | C11_47121682 | 0.349 | 0.04 (0.01, 0.07)    | 0.0078   | 0.06 (-0.02, 0.13)   | 0.14    | 0.02 (-0.01, 0.05)   | 0.25    | -0.01 (-0.15, 0.13)  | 0.85    |
| G rs2279439  | C11_47153558 | 0.754 | -0.06 (-0.09, -0.02) | 0.0012   | -0.02 (-0.11, 0.06)  | 0.59    | -0.03 (-0.07, 0.00)  | 0.075   | 0.01 (-0.17, 0.18)   | 0.92    |
| A rs2016266  | C12_52014222 | 0.685 | -0.04 (-0.07, -0.00) | 0.031    | -0.07 (-0.16, 0.02)  | 0.12    | -0.08 (-0.12, -0.04) | 5.4E-05 | -0.12 (-0.22, -0.02) | 0.022   |
| A rs10876432 | C12_52018158 | 0.726 | -0.05 (-0.09, -0.02) | 0.0038   | -0.03 (-0.11, 0.06)  | 0.55    | -0.09 (-0.13, -0.05) | 4.5E-06 | -0.10 (-0.20, 0.01)  | 0.073   |
| A rs7992970  | C13_41843463 | 0.779 | -0.07 (-0.11, -0.03) | 0.00018  | -0.11 (-0.19, -0.03) | 0.011   | -0.10 (-0.14, -0.06) | 2.2E-07 | -0.17 (-0.26, -0.08) | 0.00021 |
| T rs9594738  | C13_41850145 | 0.562 | -0.11 (-0.15, -0.07) | 3.0E-08  | -0.07 (-0.14, 0.01)  | 0.108   | -0.18 (-0.22, -0.14) | 1.5E-19 | -0.13 (-0.21, -0.05) | 0.0019  |
| A rs10507508 | C13_41867782 | 0.947 | -0.12 (-0.18, -0.05) | 0.00093  | -0.21 (-0.36, -0.05) | 0.011   | -0.17 (-0.24, -0.10) | 3.6E-06 | -0.18 (-0.35, -0.01) | 0.042   |
| T rs9594759  | C13_41930593 | 0.624 | -0.08 (-0.11, -0.05) | 3.1E-07  | -0.02 (-0.11, 0.08)  | 0.74    | -0.13 (-0.16, -0.10) | 3.9E-15 | -0.11 (-0.19, -0.03) | 0.0070  |
| A rs3783833  | C14_90505343 | 0.853 | -0.05 (-0.10, -0.01) | 0.018    | -0.11 (-0.20, -0.02) | 0.019   | -0.07 (-0.12, -0.03) | 0.0012  | -0.10 (-0.20, 0.00)  | 0.061   |
| A rs1286077  | C14_90516137 | 0.866 | -0.04 (-0.09, 0.01)  | 0.13     | -0.15 (-0.25, -0.05) | 0.004   | -0.07 (-0.12, -0.02) | 0.0032  | -0.10 (-0.21, 0.01)  | 0.067   |
| C rs884013   | C18_44710128 | 0.925 | -0.12 (-0.18, -0.06) | 9.03E-05 | -0.05 (-0.18, 0.09)  | 0.50    | -0.07 (-0.13, -0.01) | 0.030   | -0.02 (-0.17, 0.12)  | 0.73    |
| C rs713485   | C18_57421905 | 0.331 | -0.04 (-0.07, -0.00) | 0.036    | -0.08 (-0.16, -0.00) | 0.045   | -0.06 (-0.09, -0.02) | 0.0011  | -0.11 (-0.20, -0.02) | 0.016   |
| A rs1377172  | C18_57447361 | 0.327 | -0.05 (-0.08, -0.01) | 0.014    | -0.11 (-0.20, -0.02) | 0.014   | -0.07 (-0.11, -0.03) | 0.00050 | -0.14 (-0.23, -0.04) | 0.0074  |
| C rs4507007  | C18_57537499 | 0.123 | -0.09 (-0.13, -0.04) | 0.00033  | 0.01 (-0.06, 0.07)   | 0.87    | -0.08 (-0.13, -0.04) | 0.00060 | -0.13 (-0.25, -0.02) | 0.024   |
| A rs3018362  | C18_58233073 | 0.354 | -0.08 (-0.11, -0.05) | 1.3E-06  | -0.05 (-0.12, 0.03)  | 0.22    | -0.07 (-0.10, -0.03) | 5.6E-05 | -0.05 (-0.13, 0.04)  | 0.30    |
| A rs2232965  | C19_18287950 | 0.198 | -0.07 (-0.11, -0.03) | 0.00021  | -0.08 (-0.17, 0.01)  | 0.084   | -0.03 (-0.08, 0.01)  | 0.10    | -0.07 (-0.18, 0.03)  | 0.17    |
| T rs209956   | C20_52156263 | 0.723 | 0.04 (0.01, 0.08)    | 0.021    | 0.03 (-0.05, 0.11)   | 0.50    | 0.03 (-0.01, 0.07)   | 0.13    | 0.02 (-0.07, 0.11)   | 0.67    |
| C rs4810077  | C20_55477509 | 0.351 | -0.02 (-0.06, 0.01)  | 0.15     | 0.01 (-0.03, 0.05)   | 0.65    | -0.04 (-0.08, -0.01) | 0.013   | -0.03 (-0.16, 0.10)  | 0.65    |
| A rs1006899  | C21_14766923 | 0.838 | -0.02 (-0.07, 0.02)  | 0.33     | -0.14 (-0.23, -0.04) | 0.007   | -0.09 (-0.13, -0.04) | 7.6E-05 | -0.10 (-0.23, 0.02)  | 0.099   |
| T rs2244352  | C21_39679843 | 0.332 | -0.02 (-0.06, 0.01)  | 0.19     | -0.02 (-0.09, 0.06)  | 0.65    | -0.06 (-0.09, -0.02) | 0.0016  | -0.02 (-0.09, 0.06)  | 0.65    |
| C rs9306419  | C22_24699358 | 0.873 | -0.11 (-0.16, -0.06) | 8.1E-06  | -0.04 (-0.17, 0.08)  | 0.48    | -0.12 (-0.17, -0.07) | 2.0E-06 | -0.00 (-0.04, 0.04)  | 0.94    |

Data is shown for the overall combined analysis.

**Supplementary Table 5. Osteoporotic fracture analysis.** The numbers of cases of any low trauma fractures, forearm fractures, hip fractures and vertebral fractures are: 2986, 617, 1087 and 263 for Iceland; 905, 515, 101 and 203 for Denmark and 550, 125, 156 and 251 for Australia.

|                                  | Iceland             |                       |      |         | Denmark            |                      |      |         | Australia          |                     |      |         | Overall Combined |         |
|----------------------------------|---------------------|-----------------------|------|---------|--------------------|----------------------|------|---------|--------------------|---------------------|------|---------|------------------|---------|
|                                  | OFx frq<br>(n=2986) | Ctrl frq<br>(n=35400) | OR   | P value | OFx frq<br>(n=870) | Ctrl frq<br>(n=1040) | OR   | P value | OFx frq<br>(n=550) | Ctrl frq<br>(N=345) | OR   | P value | OR               | P value |
| <b>1p36 - A rs7524102</b>        |                     |                       |      |         |                    |                      |      |         |                    |                     |      |         |                  |         |
| Any fracture                     | 0.829               | 0.817                 | 1.09 | 0.025   | 0.861              | 0.834                | 1.23 | 0.024   | 0.846              | 0.811               | 1.29 | 0.059   | 1.12 (1.05,1.20) | 0.00084 |
| Forearm fracture                 | 0.832               | 0.817                 | 1.11 | 0.11    | 0.868              | 0.834                | 1.31 | 0.014   | 0.841              | 0.811               | 1.24 | 0.31    | 1.16 (1.05,1.29) | 0.0053  |
| Hip fracture                     | 0.828               | 0.817                 | 1.08 | 0.24    | 0.875              | 0.834                | 1.39 | 0.13    | 0.901              | 0.811               | 2.12 | 0.00053 | 1.15 (1.03,1.29) | 0.016   |
| Vertebral fracture               | 0.834               | 0.817                 | 1.12 | 0.37    | 0.869              | 0.834                | 1.32 | 0.082   | 0.845              | 0.811               | 1.28 | 0.15    | 1.22 (1.03,1.44) | 0.022   |
| <b>1p36 - G rs6696981</b>        |                     |                       |      |         |                    |                      |      |         |                    |                     |      |         |                  |         |
| Any fracture                     | 0.872               | 0.858                 | 1.13 | 0.0041  | 0.902              | 0.879                | 1.27 | 0.024   | 0.897              | 0.880               | 1.18 | 0.28    | 1.15 (1.07,1.25) | 0.00024 |
| Forearm fracture                 | 0.875               | 0.858                 | 1.15 | 0.049   | 0.904              | 0.879                | 1.30 | 0.038   | 0.883              | 0.880               | 1.02 | 0.93    | 1.17 (1.04,1.32) | 0.0076  |
| Hip fracture                     | 0.871               | 0.858                 | 1.11 | 0.14    | 0.911              | 0.879                | 1.41 | 0.17    | 0.936              | 0.880               | 1.99 | 0.0085  | 1.17 (1.03,1.33) | 0.016   |
| Vertebral fracture               | 0.878               | 0.859                 | 1.18 | 0.24    | 0.918              | 0.879                | 1.54 | 0.020   | 0.908              | 0.880               | 1.34 | 0.15    | 1.31 (1.08,1.59) | 0.0059  |
| <b>6p21 - MHC -T rs3130340</b>   |                     |                       |      |         |                    |                      |      |         |                    |                     |      |         |                  |         |
| Any fracture                     | 0.800               | 0.786                 | 1.09 | 0.0180  | 0.782              | 0.761                | 1.13 | 0.12    | 0.775              | 0.777               | 0.98 | 0.89    | 1.09 (1.02,1.16) | 0.0077  |
| Forearm fracture                 | 0.805               | 0.787                 | 1.12 | 0.0661  | 0.776              | 0.761                | 1.09 | 0.38    | 0.811              | 0.777               | 1.23 | 0.29    | 1.11 (1.01,1.23) | 0.026   |
| Hip fracture                     | 0.801               | 0.787                 | 1.09 | 0.15    | 0.809              | 0.761                | 1.33 | 0.13    | 0.803              | 0.777               | 1.17 | 0.39    | 1.11 (1.00,1.24) | 0.044   |
| Vertebral fracture               | 0.809               | 0.787                 | 1.15 | 0.25    | 0.794              | 0.761                | 1.21 | 0.16    | 0.774              | 0.777               | 0.98 | 0.90    | 1.12 (0.96,1.30) | 0.14    |
| <b>6q25 - ESR1 -C rs9479055</b>  |                     |                       |      |         |                    |                      |      |         |                    |                     |      |         |                  |         |
| Any fracture                     | 0.355               | 0.348                 | 1.03 | 0.29    | 0.390              | 0.356                | 1.16 | 0.030   | 0.413              | 0.406               | 1.03 | 0.77    | 1.05 (1.00,1.11) | 0.061   |
| Forearm fracture                 | 0.361               | 0.348                 | 1.06 | 0.25    | 0.389              | 0.356                | 1.15 | 0.077   | 0.450              | 0.406               | 1.20 | 0.25    | 1.09 (1.01,1.19) | 0.031   |
| Hip fracture                     | 0.324               | 0.349                 | 0.89 | 0.026   | 0.414              | 0.356                | 1.28 | 0.116   | 0.441              | 0.406               | 1.16 | 0.33    | 0.94 (0.86,1.03) | 0.21    |
| Vertebral fracture               | 0.372               | 0.348                 | 1.11 | 0.30    | 0.393              | 0.356                | 1.17 | 0.17    | 0.369              | 0.406               | 0.86 | 0.23    | 1.06 (0.93,1.20) | 0.40    |
| <b>6q25 - ESR1 - T rs4870044</b> |                     |                       |      |         |                    |                      |      |         |                    |                     |      |         |                  |         |
| Any fracture                     | 0.281               | 0.281                 | 1.00 | 1.00    | 0.277              | 0.252                | 1.14 | 0.082   | 0.302              | 0.300               | 1.01 | 0.95    | 1.02 (0.97,1.09) | 0.14    |
| Forearm fracture                 | 0.284               | 0.281                 | 1.01 | 0.79    | 0.281              | 0.252                | 1.16 | 0.093   | 0.330              | 0.300               | 1.15 | 0.41    | 1.06 (0.97,1.15) | 0.20    |
| Hip fracture                     | 0.254               | 0.282                 | 0.87 | 0.0087  | 0.291              | 0.252                | 1.22 | 0.25    | 0.312              | 0.300               | 1.05 | 0.74    | 0.91 (0.83,1.00) | 0.051   |
| Vertebral fracture               | 0.298               | 0.281                 | 1.08 | 0.45    | 0.295              | 0.252                | 1.24 | 0.085   | 0.282              | 0.300               | 0.91 | 0.51    | 1.08 (0.94,1.24) | 0.26    |
| <b>6q25 - ESR1 - G rs1038304</b> |                     |                       |      |         |                    |                      |      |         |                    |                     |      |         |                  |         |
| Any fracture                     | 0.472               | 0.469                 | 1.01 | 0.72    | 0.511              | 0.476                | 1.15 | 0.030   | 0.524              | 0.485               | 1.17 | 0.12    | 1.04 (0.99,1.10) | 0.11    |
| Forearm fracture                 | 0.480               | 0.469                 | 1.05 | 0.34    | 0.517              | 0.476                | 1.18 | 0.032   | 0.509              | 0.485               | 1.10 | 0.53    | 1.08 (1.00,1.17) | 0.041   |
| Hip fracture                     | 0.457               | 0.470                 | 0.95 | 0.30    | 0.474              | 0.476                | 0.99 | 0.96    | 0.500              | 0.485               | 1.06 | 0.68    | 0.96 (0.89,1.05) | 0.40    |
| Vertebral fracture               | 0.487               | 0.469                 | 1.07 | 0.46    | 0.513              | 0.476                | 1.16 | 0.18    | 0.549              | 0.485               | 1.29 | 0.041   | 1.15 (1.02,1.30) | 0.024   |
| <b>6q25 - ESR1 - A rs6929137</b> |                     |                       |      |         |                    |                      |      |         |                    |                     |      |         |                  |         |
| Any fracture                     | 0.299               | 0.298                 | 1.00 | 0.90    | 0.323              | 0.288                | 1.18 | 0.019   | 0.361              | 0.317               | 1.22 | 0.054   | 1.05 (0.99,1.10) | 0.12    |
| Forearm fracture                 | 0.300               | 0.298                 | 1.01 | 0.86    | 0.326              | 0.288                | 1.19 | 0.033   | 0.338              | 0.317               | 1.10 | 0.55    | 1.06 (0.98,1.16) | 0.16    |

|                                    |       |       |      |         |       |       |      |       |       |       |      |       |                  |         |
|------------------------------------|-------|-------|------|---------|-------|-------|------|-------|-------|-------|------|-------|------------------|---------|
| Hip fracture                       | 0.294 | 0.299 | 0.98 | 0.67    | 0.286 | 0.288 | 0.99 | 0.95  | 0.349 | 0.317 | 1.16 | 0.33  | 1.00 (0.91,1.09) | 0.92    |
| Vertebral fracture                 | 0.317 | 0.298 | 1.09 | 0.40    | 0.326 | 0.288 | 1.20 | 0.14  | 0.388 | 0.317 | 1.37 | 0.016 | 1.19 (1.05,1.36) | 0.0086  |
| <b>6q25 - ESR1 - C rs1999805</b>   |       |       |      |         |       |       |      |       |       |       |      |       |                  |         |
| Any fracture                       | 0.440 | 0.437 | 1.01 | 0.72    | 0.413 | 0.401 | 1.05 | 0.47  | 0.471 | 0.434 | 1.16 | 0.17  | 1.03 (0.97,1.08) | 0.35    |
| Forearm fracture                   | 0.452 | 0.437 | 1.06 | 0.21    | 0.410 | 0.401 | 1.04 | 0.63  | 0.505 | 0.434 | 1.33 | 0.089 | 1.07 (0.99,1.16) | 0.093   |
| Hip fracture                       | 0.428 | 0.438 | 0.96 | 0.39    | 0.431 | 0.401 | 1.13 | 0.43  | 0.477 | 0.434 | 1.19 | 0.28  | 0.99 (0.91,1.08) | 0.80    |
| Vertebral fracture                 | 0.412 | 0.437 | 0.90 | 0.29    | 0.431 | 0.401 | 1.13 | 0.28  | 0.429 | 0.434 | 0.98 | 0.87  | 0.99 (0.87,1.12) | 0.87    |
| <b>8q24 - OPG - C rs6993813</b>    |       |       |      |         |       |       |      |       |       |       |      |       |                  |         |
| Any fracture                       | 0.508 | 0.496 | 1.05 | 0.086   | 0.532 | 0.517 | 1.06 | 0.36  | 0.539 | 0.519 | 1.08 | 0.44  | 1.06 (1.00,1.11) | 0.039   |
| Forearm fracture                   | 0.523 | 0.496 | 1.12 | 0.024   | 0.539 | 0.517 | 1.09 | 0.26  | 0.519 | 0.519 | 1.00 | 1.00  | 1.11 (1.02,1.20) | 0.012   |
| Hip fracture                       | 0.497 | 0.497 | 1.00 | 1.00    | 0.567 | 0.517 | 1.22 | 0.18  | 0.553 | 0.519 | 1.15 | 0.38  | 1.19 (0.96,1.47) | 0.12    |
| Vertebral fracture                 | 0.536 | 0.496 | 1.17 | 0.10    | 0.573 | 0.517 | 1.25 | 0.045 | 0.529 | 0.519 | 1.04 | 0.75  | 1.17 (1.03,1.32) | 0.017   |
| <b>8q24 - OPG - A rs6469804</b>    |       |       |      |         |       |       |      |       |       |       |      |       |                  |         |
| Any fracture                       | 0.521 | 0.510 | 1.05 | 0.13    | 0.551 | 0.540 | 1.04 | 0.51  | 0.574 | 0.540 | 1.15 | 0.17  | 1.05 (1.00,1.11) | 0.052   |
| Forearm fracture                   | 0.536 | 0.510 | 1.11 | 0.032   | 0.552 | 0.540 | 1.05 | 0.54  | 0.561 | 0.540 | 1.09 | 0.58  | 1.09 (1.01,1.18) | 0.027   |
| Hip fracture                       | 0.511 | 0.511 | 1.00 | 0.99    | 0.558 | 0.540 | 1.08 | 0.63  | 0.592 | 0.540 | 1.24 | 0.15  | 1.03 (0.94,1.13) | 0.53    |
| Vertebral fracture                 | 0.539 | 0.511 | 1.12 | 0.25    | 0.593 | 0.540 | 1.24 | 0.052 | 0.564 | 0.540 | 1.10 | 0.44  | 1.15 (1.02,1.30) | 0.024   |
| <b>13q14 - RANKL - T rs9594738</b> |       |       |      |         |       |       |      |       |       |       |      |       |                  |         |
| Any fracture                       | 0.575 | 0.559 | 1.07 | 0.085   | 0.488 | 0.486 | 1.01 | 0.90  | 0.466 | 0.486 | 0.92 | 0.42  | 1.04 (0.98,1.11) | 0.23    |
| Forearm fracture                   | 0.584 | 0.562 | 1.10 | 0.10    | 0.477 | 0.486 | 0.97 | 0.67  | 0.491 | 0.486 | 1.02 | 0.90  | 1.05 (0.96,1.14) | 0.29    |
| Hip fracture                       | 0.569 | 0.564 | 1.02 | 0.75    | 0.511 | 0.486 | 1.10 | 0.51  | 0.454 | 0.486 | 0.88 | 0.38  | 1.01 (0.91,1.11) | 0.84    |
| Vertebral fracture                 | 0.585 | 0.564 | 1.09 | 0.40    | 0.511 | 0.486 | 1.11 | 0.37  | 0.466 | 0.486 | 0.92 | 0.53  | 1.05 (0.92,1.19) | 0.47    |
| <b>13q14 - RANKL - T rs9594759</b> |       |       |      |         |       |       |      |       |       |       |      |       |                  |         |
| Any fracture                       | 0.631 | 0.624 | 1.03 | 0.33    | 0.551 | 0.559 | 0.97 | 0.65  | 0.531 | 0.533 | 0.99 | 0.94  | 1.02 (0.97,1.07) | 0.52    |
| Forearm fracture                   | 0.647 | 0.624 | 1.11 | 0.044   | 0.536 | 0.559 | 0.91 | 0.24  | 0.588 | 0.533 | 1.25 | 0.14  | 1.06 (0.98,1.15) | 0.16    |
| Hip fracture                       | 0.619 | 0.625 | 0.98 | 0.62    | 0.622 | 0.559 | 1.30 | 0.083 | 0.500 | 0.533 | 0.88 | 0.36  | 0.99 (0.91,1.08) | 0.82    |
| Vertebral fracture                 | 0.643 | 0.624 | 1.08 | 0.42    | 0.579 | 0.559 | 1.09 | 0.45  | 0.519 | 0.533 | 0.95 | 0.65  | 1.05 (0.92,1.19) | 0.48    |
| <b>2p16 - G rs11898505</b>         |       |       |      |         |       |       |      |       |       |       |      |       |                  |         |
| Any fracture                       | 0.693 | 0.673 | 1.10 | 0.0041  | 0.663 | 0.635 | 1.13 | 0.076 | 0.663 | 0.616 | 1.22 | 0.054 | 1.11 (1.05,1.17) | 0.00018 |
| Forearm fracture                   | 0.708 | 0.674 | 1.17 | 0.0025  | 0.660 | 0.635 | 1.12 | 0.17  | 0.615 | 0.616 | 1.00 | 0.99  | 1.15 (1.05,1.25) | 0.0014  |
| Hip fracture                       | 0.678 | 0.675 | 1.02 | 0.76    | 0.652 | 0.635 | 1.07 | 0.65  | 0.629 | 0.616 | 1.06 | 0.72  | 1.02 (0.94,1.12) | 0.60    |
| Vertebral fracture                 | 0.744 | 0.675 | 1.40 | 0.0015  | 0.676 | 0.635 | 1.20 | 0.12  | 0.669 | 0.616 | 1.26 | 0.083 | 1.29 (1.13,1.48) | 0.00015 |
| <b>2p16 - G rs4315567</b>          |       |       |      |         |       |       |      |       |       |       |      |       |                  |         |
| Any fracture                       | 0.702 | 0.685 | 1.08 | 0.013   | 0.662 | 0.643 | 1.09 | 0.22  | 0.675 | 0.638 | 1.18 | 0.12  | 1.09 (1.03,1.15) | 0.0021  |
| Forearm fracture                   | 0.710 | 0.685 | 1.12 | 0.029   | 0.668 | 0.643 | 1.12 | 0.18  | 0.612 | 0.638 | 0.89 | 0.48  | 1.10 (1.01,1.20) | 0.023   |
| Hip fracture                       | 0.689 | 0.686 | 1.02 | 0.77    | 0.642 | 0.643 | 0.99 | 0.97  | 0.679 | 0.638 | 1.20 | 0.24  | 1.03 (0.94,1.13) | 0.54    |
| Vertebral fracture                 | 0.761 | 0.685 | 1.46 | 0.00047 | 0.681 | 0.643 | 1.18 | 0.16  | 0.680 | 0.638 | 1.21 | 0.16  | 1.29 (1.13,1.48) | 0.00018 |
| <b>18q21 - RANK - A rs3018362</b>  |       |       |      |         |       |       |      |       |       |       |      |       |                  |         |
| Any fracture                       | 0.365 | 0.353 | 1.06 | 0.0815  | 0.382 | 0.342 | 1.18 | 0.012 | 0.349 | 0.324 | 1.12 | 0.29  | 1.08 (1.02,1.14) | 0.0050  |
| Forearm fracture                   | 0.370 | 0.354 | 1.08 | 0.15    | 0.362 | 0.342 | 1.09 | 0.30  | 0.345 | 0.324 | 1.10 | 0.56  | 1.08 (1.00,1.17) | 0.062   |
| Hip fracture                       | 0.356 | 0.354 | 1.01 | 0.88    | 0.346 | 0.342 | 1.01 | 0.93  | 0.336 | 0.324 | 1.06 | 0.72  | 1.01 (0.93,1.11) | 0.79    |
| Vertebral fracture                 | 0.352 | 0.354 | 0.99 | 0.94    | 0.405 | 0.342 | 1.31 | 0.019 | 0.339 | 0.324 | 1.07 | 0.60  | 1.11 (0.97,1.26) | 0.12    |

**11p11 - LRP4 - G rs2306033**

|                    |       |       |      |       |       |       |      |      |       |       |      |       |                  |        |
|--------------------|-------|-------|------|-------|-------|-------|------|------|-------|-------|------|-------|------------------|--------|
| Any fracture       | 0.865 | 0.854 | 1.10 | 0.029 | 0.874 | 0.860 | 1.13 | 0.21 | 0.877 | 0.859 | 1.17 | 0.31  | 1.11 (1.03,1.19) | 0.0074 |
| Forearm fracture   | 0.868 | 0.854 | 1.13 | 0.093 | 0.875 | 0.860 | 1.14 | 0.25 | 0.883 | 0.859 | 1.24 | 0.39  | 1.14 (1.01,1.27) | 0.030  |
| Hip fracture       | 0.867 | 0.854 | 1.11 | 0.12  | 0.846 | 0.860 | 0.90 | 0.61 | 0.876 | 0.859 | 1.16 | 0.51  | 1.10 (0.97,1.24) | 0.15   |
| Vertebral fracture | 0.860 | 0.855 | 1.05 | 0.74  | 0.880 | 0.860 | 1.20 | 0.28 | 0.896 | 0.859 | 1.42 | 0.081 | 1.17 (0.97,1.4)  | 0.10   |

**G rs7935346**

|                    |       |       |      |      |       |       |      |       |       |       |      |       |                  |       |
|--------------------|-------|-------|------|------|-------|-------|------|-------|-------|-------|------|-------|------------------|-------|
| Any fracture       | 0.776 | 0.768 | 1.05 | 0.21 | 0.783 | 0.756 | 1.16 | 0.053 | 0.792 | 0.750 | 1.27 | 0.055 | 1.08 (1.01,1.14) | 0.019 |
| Forearm fracture   | 0.777 | 0.769 | 1.05 | 0.42 | 0.784 | 0.756 | 1.17 | 0.092 | 0.797 | 0.750 | 1.31 | 0.19  | 1.09 (0.99,1.20) | 0.067 |
| Hip fracture       | 0.776 | 0.769 | 1.04 | 0.50 | 0.772 | 0.756 | 1.10 | 0.62  | 0.760 | 0.750 | 1.06 | 0.76  | 1.05 (0.94,1.16) | 0.40  |
| Vertebral fracture | 0.779 | 0.769 | 1.06 | 0.63 | 0.791 | 0.756 | 1.22 | 0.14  | 0.799 | 0.750 | 1.33 | 0.071 | 1.17 (1.01,1.36) | 0.041 |

**A rs7121418**

|                    |       |       |      |      |       |       |      |       |       |       |      |       |                  |       |
|--------------------|-------|-------|------|------|-------|-------|------|-------|-------|-------|------|-------|------------------|-------|
| Any fracture       | 0.660 | 0.651 | 1.04 | 0.17 | 0.690 | 0.660 | 1.15 | 0.042 | 0.695 | 0.682 | 1.06 | 0.59  | 1.06 (1.01,1.12) | 0.030 |
| Forearm fracture   | 0.660 | 0.651 | 1.04 | 0.43 | 0.688 | 0.660 | 1.14 | 0.12  | 0.740 | 0.682 | 1.33 | 0.115 | 1.08 (0.99,1.17) | 0.068 |
| Hip fracture       | 0.654 | 0.651 | 1.01 | 0.85 | 0.668 | 0.660 | 1.04 | 0.80  | 0.669 | 0.682 | 0.94 | 0.72  | 1.01 (0.92,1.10) | 0.89  |
| Vertebral fracture | 0.672 | 0.651 | 1.10 | 0.36 | 0.694 | 0.660 | 1.17 | 0.18  | 0.678 | 0.682 | 0.98 | 0.90  | 1.09 (0.96,1.25) | 0.19  |

**G rs2279439**

|                    |       |       |      |      |       |       |      |       |       |       |      |       |                  |       |
|--------------------|-------|-------|------|------|-------|-------|------|-------|-------|-------|------|-------|------------------|-------|
| Any fracture       | 0.757 | 0.754 | 1.02 | 0.59 | 0.777 | 0.750 | 1.17 | 0.060 | 0.791 | 0.744 | 1.31 | 0.034 | 1.05 (0.99,1.12) | 0.086 |
| Forearm fracture   | 0.760 | 0.754 | 1.03 | 0.57 | 0.776 | 0.750 | 1.16 | 0.14  | 0.787 | 0.744 | 1.27 | 0.23  | 1.07 (0.98,1.18) | 0.14  |
| Hip fracture       | 0.752 | 0.754 | 0.99 | 0.85 | 0.763 | 0.750 | 1.08 | 0.68  | 0.770 | 0.744 | 1.15 | 0.44  | 1.01 (0.91,1.11) | 0.88  |
| Vertebral fracture | 0.771 | 0.754 | 1.10 | 0.40 | 0.784 | 0.750 | 1.21 | 0.19  | 0.796 | 0.744 | 1.35 | 0.061 | 1.19 (1.02,1.38) | 0.028 |

**12q13 - OSX - A rs10876432**

|                    |       |       |      |      |       |       |      |       |       |       |      |      |                  |      |
|--------------------|-------|-------|------|------|-------|-------|------|-------|-------|-------|------|------|------------------|------|
| Any fracture       | 0.727 | 0.726 | 1.01 | 0.88 | 0.732 | 0.705 | 1.14 | 0.096 | 0.700 | 0.713 | 0.94 | 0.60 | 1.02 (0.96,1.10) | 0.48 |
| Forearm fracture   | 0.739 | 0.726 | 1.07 | 0.32 | 0.724 | 0.705 | 1.10 | 0.35  | 0.679 | 0.713 | 0.85 | 0.39 | 1.06 (0.95,1.18) | 0.29 |
| Hip fracture       | 0.726 | 0.726 | 1.00 | 1.00 | 0.719 | 0.705 | 1.07 | 0.71  | 0.665 | 0.713 | 0.80 | 0.21 | 0.92 (0.72,1.18) | 0.52 |
| Vertebral fracture | 0.732 | 0.726 | 1.03 | 0.80 | 0.719 | 0.705 | 1.07 | 0.58  | 0.721 | 0.713 | 1.04 | 0.81 | 1.05 (0.90,1.22) | 0.54 |

**Supplementary Table 6A**

**Ranking of Candidate genes in list of top 5000 SNPs associated with the spine BMD**

| SNP        | Allele | Chr.  | Position<br>Build36 | rank | effect               | p        | Candidate<br>gene(s)* |
|------------|--------|-------|---------------------|------|----------------------|----------|-----------------------|
| rs9594759  | T      | chr13 | 41930593            | 1    | -0.13 (-0.18, -0.09) | 1.17E-08 | RANKL                 |
| rs2504063  | A      | chr6  | 152132400           | 2    | -0.12 (-0.17, -0.08) | 5.68E-08 | ESR1                  |
| rs851982   | T      | chr6  | 152066678           | 3    | -0.12 (-0.16, -0.07) | 1.56E-07 | ESR1                  |
| rs2504070  | T      | chr6  | 152126666           | 4    | -0.12 (-0.17, -0.08) | 4.62E-07 | ESR1                  |
| rs7992970  | A      | chr13 | 41843463            | 5    | -0.13 (-0.19, -0.08) | 8.50E-07 | RANKL                 |
| rs1999805  | C      | chr6  | 152110057           | 9    | -0.11 (-0.15, -0.06) | 2.27E-06 | ESR1                  |
| rs3020331  | C      | chr6  | 152050473           | 10   | -0.10 (-0.15, -0.06) | 3.41E-06 | ESR1                  |
| rs4870044  | T      | chr6  | 151943102           | 11   | -0.11 (-0.16, -0.07) | 4.09E-06 | ESR1                  |
| rs7752591  | A      | chr6  | 151988761           | 15   | -0.10 (-0.14, -0.06) | 6.94E-06 | ESR1                  |
| rs1038304  | G      | chr6  | 151974868           | 19   | -0.10 (-0.14, -0.06) | 8.25E-06 | ESR1                  |
| rs6469804  | A      | chr8  | 120114010           | 20   | -0.10 (-0.14, -0.06) | 8.53E-06 | OPG                   |
| rs10507507 | T      | chr13 | 41867646            | 27   | -0.13 (-0.18, -0.07) | 1.60E-05 | RANKL                 |
| rs2504065  | G      | chr6  | 152136860           | 31   | -0.10 (-0.14, -0.05) | 1.97E-05 | ESR1                  |
| rs6929137  | A      | chr6  | 151978370           | 39   | -0.10 (-0.15, -0.05) | 3.00E-05 | ESR1                  |
| rs6993813  | C      | chr8  | 120121419           | 45   | -0.09 (-0.14, -0.05) | 3.59E-05 | OPG                   |
| rs7753676  | G      | chr6  | 151918508           | 46   | -0.09 (-0.14, -0.05) | 3.62E-05 | ESR1                  |
| rs1159327  | G      | chr6  | 152089715           | 51   | -0.10 (-0.15, -0.05) | 4.33E-05 | ESR1                  |
| rs6469792  | C      | chr8  | 120077552           | 56   | -0.09 (-0.13, -0.05) | 6.19E-05 | OPG                   |
| rs6900157  | C      | chr6  | 151995820           | 68   | -0.09 (-0.14, -0.05) | 8.49E-05 | ESR1                  |
| rs7316953  | C      | chr13 | 41915470            | 69   | -0.11 (-0.16, -0.05) | 8.65E-05 | RANKL                 |
| rs4355801  | A      | chr8  | 119993054           | 88   | -0.09 (-0.13, -0.04) | 0.00013  | OPG                   |
| rs7999869  | C      | chr13 | 33160060            | 103  | -0.09 (-0.14, -0.04) | 0.00016  | RANKL                 |
| rs9478223  | C      | chr6  | 151941931           | 121  | -0.14 (-0.21, -0.07) | 0.00020  | ESR1                  |
| rs7751941  | A      | chr6  | 151988351           | 178  | -0.10 (-0.15, -0.04) | 0.00032  | ESR1                  |
| rs4898457  | G      | chrX  | 152811550           | 198  | -0.09 (-0.15, -0.04) | 0.00038  | IRAK1                 |
| rs238256   | T      | chr13 | 41821675            | 202  | -0.09 (-0.14, -0.04) | 0.00039  | RANKL                 |
| rs9533093  | T      | chr13 | 41859597            | 229  | -0.10 (-0.16, -0.04) | 0.00046  | RANKL                 |
| rs1924097  | A      | chr13 | 42207550            | 248  | -0.08 (-0.13, -0.04) | 0.00053  | RANKL                 |
| rs9479055  | C      | chr6  | 151889660           | 252  | -0.08 (-0.13, -0.03) | 0.00053  | ESR1                  |
| rs12549314 | C      | chr8  | 25516796            | 253  | -0.10 (-0.15, -0.04) | 0.00054  | GnRH                  |
| rs1564860  | T      | chr8  | 120044851           | 273  | -0.08 (-0.13, -0.04) | 0.00059  | OPG                   |
| rs12150965 | A      | chr19 | 59156210            | 292  | -0.11 (-0.18, -0.05) | 0.00068  | OSCAR                 |
| rs3018362  | A      | chr18 | 58233073            | 309  | -0.08 (-0.13, -0.03) | 0.00072  | RANK                  |
| rs9898     | C      | chr3  | 187873321           | 327  | -0.08 (-0.13, -0.03) | 0.00076  | AHSG                  |
| rs4876876  | C      | chr8  | 120055416           | 444  | -0.07 (-0.12, -0.03) | 0.00114  | OPG                   |
| rs6933660  | A      | chr6  | 151845447           | 485  | -0.08 (-0.13, -0.03) | 0.00123  | ESR1                  |
| rs3132453  | A      | chr6  | 31712023            | 504  | -0.11 (-0.18, -0.04) | 0.00129  | TNF                   |
| rs990909   | A      | chr13 | 38188569            | 536  | -0.08 (-0.13, -0.03) | 0.00140  | RANKL                 |
| rs1555587  | T      | chr13 | 42189413            | 540  | -0.09 (-0.14, -0.03) | 0.00141  | RANKL                 |
| rs923346   | C      | chr11 | 67938951            | 547  | -0.10 (-0.15, -0.04) | 0.00143  | LRP5                  |
| rs376999   | G      | chr13 | 41984646            | 570  | -0.08 (-0.12, -0.03) | 0.00149  | RANKL                 |
| rs2306862  | T      | chr11 | 67934086            | 618  | -0.09 (-0.15, -0.04) | 0.00161  | LRP5                  |
| rs2276108  | A      | chr11 | 102152746           | 622  | -0.10 (-0.17, -0.04) | 0.00163  | MMP-1                 |
| rs4803455  | A      | chr19 | 46543349            | 632  | -0.07 (-0.12, -0.03) | 0.00165  | TGFb1                 |
| rs5945361  | A      | chrX  | 152799594           | 651  | -0.09 (-0.14, -0.03) | 0.00171  | IRAK1                 |
| rs2734647  | C      | chrX  | 152945374           | 653  | -0.11 (-0.18, -0.04) | 0.00171  | IRAK1                 |
| rs2055101  | G      | chr8  | 119956104           | 664  | -0.07 (-0.11, -0.03) | 0.00175  | OPG                   |
| rs4869738  | T      | chr6  | 151933844           | 677  | -0.09 (-0.14, -0.03) | 0.00179  | ESR1                  |
| rs665657   | T      | chr13 | 41987378            | 694  | -0.07 (-0.12, -0.03) | 0.00184  | RANKL                 |
| rs6571303  | C      | chrX  | 152901148           | 746  | -0.10 (-0.17, -0.04) | 0.00198  | IRAK1                 |
| rs10507508 | A      | chr13 | 41867782            | 765  | -0.16 (-0.25, -0.06) | 0.00202  | RANKL                 |
| rs3736228  | T      | chr11 | 67957871            | 766  | -0.09 (-0.15, -0.03) | 0.00202  | LRP5                  |
| rs4806674  | T      | chr19 | 59153350            | 798  | -0.07 (-0.11, -0.02) | 0.00211  | OSCAR                 |
| rs2523674  | T      | chr6  | 31544768            | 854  | -0.07 (-0.11, -0.03) | 0.00226  | TNF                   |
| rs3734803  | A      | chr6  | 151911338           | 865  | -0.09 (-0.15, -0.03) | 0.00231  | ESR1                  |
| rs2224191  | A      | chr20 | 6755276             | 871  | -0.12 (-0.20, -0.04) | 0.00234  | BMP2                  |
| rs7322806  | G      | chr13 | 41944397            | 878  | -0.09 (-0.15, -0.03) | 0.00236  | RANKL                 |

|            |   |       |           |      |                      |         |             |
|------------|---|-------|-----------|------|----------------------|---------|-------------|
| rs10505338 | T | chr8  | 119824671 | 885  | -0.07 (-0.12, -0.03) | 0.00238 | OPG         |
| rs17774945 | C | chr5  | 58238687  | 913  | -0.14 (-0.23, -0.05) | 0.00246 | PDE4D       |
| rs2239464  | G | chrX  | 153001625 | 984  | -0.09 (-0.16, -0.03) | 0.00265 | IRAK1       |
| rs238280   | A | chr13 | 41836474  | 1054 | -0.08 (-0.13, -0.03) | 0.00287 | RANKL       |
| rs2957128  | A | chr18 | 58211715  | 1091 | -0.07 (-0.11, -0.02) | 0.00297 | RANK        |
| rs1468772  | C | chr1  | 154383112 | 1141 | -0.07 (-0.12, -0.02) | 0.00314 | BGLAP       |
| rs1557501  | C | chrX  | 152850324 | 1155 | -0.10 (-0.16, -0.03) | 0.00320 | IRAK1       |
| rs8076149  | G | chr17 | 4453303   | 1215 | -0.07 (-0.11, -0.02) | 0.00338 | ALOX15      |
| rs13098911 | T | chr3  | 46210205  | 1246 | -0.11 (-0.19, -0.04) | 0.00347 | CCR2 CCR3   |
| rs2269368  | C | chrX  | 152843013 | 1250 | -0.11 (-0.19, -0.04) | 0.00347 | IRAK1       |
| rs6444147  | C | chr3  | 187799894 | 1319 | -0.09 (-0.15, -0.03) | 0.00371 | AHSG        |
| rs11569864 | C | chr1  | 12091110  | 1328 | -0.11 (-0.19, -0.04) | 0.00374 | PLOD1 TNFR2 |
| rs10505346 | T | chr8  | 120033024 | 1345 | -0.08 (-0.13, -0.03) | 0.00379 | OPG         |
| rs608343   | G | chr11 | 67953406  | 1374 | -0.07 (-0.12, -0.02) | 0.00387 | LRP5        |
| rs2266888  | G | chrX  | 152892914 | 1454 | -0.10 (-0.16, -0.03) | 0.00413 | IRAK1       |
| rs4941417  | T | chr13 | 41612711  | 1456 | -0.08 (-0.13, -0.03) | 0.00413 | RANKL       |
| rs1264695  | T | chr6  | 30175871  | 1522 | -0.08 (-0.13, -0.02) | 0.00437 | HLA-A       |
| rs7837123  | G | chr8  | 120048430 | 1550 | -0.10 (-0.17, -0.03) | 0.00443 | OPG         |
| rs555722   | T | chr13 | 25979152  | 1554 | -0.08 (-0.14, -0.03) | 0.00445 | RANKL       |
| rs35760    | G | chr12 | 101474348 | 1560 | -0.08 (-0.14, -0.03) | 0.00447 | IGF1        |
| rs11841247 | A | chr13 | 41642049  | 1612 | -0.08 (-0.13, -0.02) | 0.00465 | RANKL       |
| rs7631551  | A | chr3  | 46161314  | 1634 | -0.11 (-0.18, -0.03) | 0.00471 | CCR3        |
| rs4576968  | A | chr13 | 40969635  | 1637 | -0.06 (-0.11, -0.02) | 0.00472 | RANKL       |
| rs1905786  | C | chr8  | 120020873 | 1663 | -0.06 (-0.11, -0.02) | 0.00477 | OPG         |
| rs17793693 | C | chr3  | 12320971  | 1679 | -0.11 (-0.19, -0.03) | 0.00483 | PPARG       |
| rs1059702  | C | chrX  | 152937386 | 1696 | -0.11 (-0.18, -0.03) | 0.00487 | IRAK1       |
| rs9285148  | G | chr13 | 41602669  | 1700 | -0.07 (-0.13, -0.02) | 0.00488 | RANKL       |
| rs853165   | C | chr5  | 142530444 | 1771 | -0.06 (-0.11, -0.02) | 0.00507 | NR3C1       |
| rs247632   | G | chr5  | 142982770 | 1880 | -0.06 (-0.11, -0.02) | 0.00544 | NR3C1       |
| rs6763361  | A | chr3  | 187793068 | 1923 | -0.07 (-0.12, -0.02) | 0.00556 | AHSG        |
| rs4661037  | T | chr1  | 154505103 | 1943 | -0.08 (-0.13, -0.02) | 0.00562 | BGLAP       |
| rs2844505  | G | chr6  | 31547042  | 1949 | -0.07 (-0.11, -0.02) | 0.00564 | TNF         |
| rs2044732  | G | chr13 | 41731400  | 2061 | -0.07 (-0.12, -0.02) | 0.00602 | RANKL       |
| rs266743   | A | chr3  | 187958485 | 2069 | -0.07 (-0.12, -0.02) | 0.00604 | AHSG        |
| rs1015390  | T | chr12 | 46630305  | 2109 | -0.09 (-0.15, -0.03) | 0.00619 | VDR         |
| rs1037272  | A | chr13 | 41688458  | 2112 | -0.08 (-0.13, -0.02) | 0.00620 | RANKL       |
| rs3130617  | C | chr6  | 31735502  | 2150 | -0.07 (-0.11, -0.02) | 0.00632 | TNF         |
| rs1409032  | C | chr13 | 23584133  | 2220 | -0.07 (-0.11, -0.02) | 0.00655 | RANKL       |
| rs152225   | A | chr5  | 142971358 | 2223 | -0.06 (-0.11, -0.02) | 0.00656 | NR3C1       |
| rs9891712  | C | chr17 | 39096330  | 2279 | -0.11 (-0.18, -0.03) | 0.00674 | SOST        |
| rs9547011  | C | chr13 | 30377640  | 2376 | -0.07 (-0.11, -0.02) | 0.00710 | RANKL       |
| rs9510894  | T | chr13 | 23321447  | 2386 | -0.07 (-0.12, -0.02) | 0.00714 | RANKL       |
| rs9315903  | G | chr13 | 41736604  | 2402 | -0.09 (-0.16, -0.03) | 0.00718 | RANKL       |
| rs9548463  | T | chr13 | 31119841  | 2453 | -0.12 (-0.20, -0.03) | 0.00733 | RANKL       |
| rs6441961  | T | chr3  | 46327388  | 2461 | -0.07 (-0.12, -0.02) | 0.00736 | CCR2 CCR3   |
| rs4770482  | C | chr13 | 23194067  | 2485 | -0.08 (-0.14, -0.02) | 0.00746 | RANKL       |
| rs7566418  | A | chr2  | 161555483 | 2490 | -0.06 (-0.11, -0.02) | 0.00749 | TANK        |
| rs1485303  | A | chr8  | 120045437 | 2502 | -0.06 (-0.10, -0.02) | 0.00753 | OPG         |
| rs852003   | A | chr6  | 152003895 | 2574 | -0.06 (-0.10, -0.02) | 0.00778 | ESR1        |
| rs442277   | G | chr22 | 18432566  | 2584 | -0.06 (-0.11, -0.02) | 0.00782 | COMT        |
| rs7324038  | T | chr13 | 19453812  | 2590 | -0.11 (-0.19, -0.03) | 0.00785 | RANKL       |
| rs4463269  | T | chr6  | 151903921 | 2610 | -0.07 (-0.12, -0.02) | 0.00791 | ESR1        |
| rs13336428 | A | chr16 | 1472464   | 2659 | -0.06 (-0.11, -0.02) | 0.00808 | CLCN7       |
| rs6054529  | C | chr20 | 6746495   | 2773 | -0.06 (-0.10, -0.02) | 0.00841 | BMP2        |
| rs4764702  | A | chr12 | 101461236 | 2775 | -0.08 (-0.14, -0.02) | 0.00842 | IGF1        |
| rs624003   | T | chr11 | 67987816  | 2802 | -0.06 (-0.11, -0.02) | 0.00849 | LRP5        |
| rs1457596  | G | chr12 | 101486637 | 2814 | -0.09 (-0.16, -0.02) | 0.00853 | IGF1        |
| rs7331220  | C | chr13 | 42192055  | 2826 | -0.07 (-0.12, -0.02) | 0.00857 | RANKL       |
| rs6214     | G | chr12 | 101317699 | 2831 | -0.06 (-0.10, -0.02) | 0.00859 | IGF1        |
| rs2321566  | G | chr13 | 33169418  | 2848 | -0.06 (-0.10, -0.02) | 0.00863 | RANKL       |
| rs4870024  | C | chr6  | 151872462 | 2861 | -0.08 (-0.14, -0.02) | 0.00866 | ESR1        |
| rs1264702  | A | chr6  | 30173554  | 2944 | -0.07 (-0.13, -0.02) | 0.00892 | HLA-A       |

|            |   |       |           |      |                      |         |         |
|------------|---|-------|-----------|------|----------------------|---------|---------|
| rs10492440 | T | chr13 | 41660106  | 2994 | -0.09 (-0.15, -0.02) | 0.00908 | RANKL   |
| rs3134058  | A | chr8  | 120023289 | 3018 | -0.06 (-0.10, -0.01) | 0.00914 | OPG     |
| rs916570   | T | chr6  | 30174010  | 3083 | -0.07 (-0.12, -0.02) | 0.00932 | HLA-A   |
| rs1157106  | T | chr4  | 55056149  | 3144 | -0.06 (-0.11, -0.01) | 0.00949 | KIT     |
| rs17077384 | C | chr13 | 31757048  | 3181 | -0.11 (-0.19, -0.03) | 0.00964 | RANKL   |
| rs851993   | T | chr6  | 152047704 | 3187 | -0.06 (-0.10, -0.01) | 0.00967 | ESR1    |
| rs4526865  | G | chr13 | 28788283  | 3194 | -0.06 (-0.11, -0.01) | 0.00968 | RANKL   |
| rs2321480  | C | chr13 | 33162201  | 3219 | -0.06 (-0.10, -0.01) | 0.00973 | RANKL   |
| rs1530641  | G | chr3  | 187718601 | 3235 | -0.06 (-0.11, -0.01) | 0.00979 | AHSG    |
| rs397701   | T | chr22 | 18412327  | 3262 | -0.06 (-0.10, -0.01) | 0.00987 | COMT    |
| rs712219   | G | chr6  | 152020132 | 3363 | -0.06 (-0.10, -0.01) | 0.010   | ESR1    |
| rs3917498  | C | chr7  | 94784191  | 3381 | -0.06 (-0.11, -0.01) | 0.010   | PON1    |
| rs12489988 | G | chr3  | 123206390 | 3384 | -0.10 (-0.17, -0.02) | 0.010   | CASR    |
| rs1002036  | C | chr13 | 30405727  | 3409 | -0.07 (-0.12, -0.02) | 0.010   | RANKL   |
| rs1485302  | A | chr8  | 120045325 | 3549 | -0.06 (-0.10, -0.01) | 0.011   | OPG     |
| rs9397066  | A | chr6  | 151961629 | 3563 | -0.07 (-0.12, -0.02) | 0.011   | ESR1    |
| rs546803   | C | chr11 | 67942968  | 3623 | -0.06 (-0.11, -0.01) | 0.011   | LRP5    |
| rs2559836  | T | chr12 | 101459392 | 3661 | -0.08 (-0.14, -0.02) | 0.011   | IGF1    |
| rs4686428  | G | chr3  | 187730067 | 3676 | -0.07 (-0.12, -0.02) | 0.011   | AHSG    |
| rs8097062  | G | chr18 | 58236020  | 3678 | -0.06 (-0.10, -0.01) | 0.011   | RANK    |
| rs1564858  | A | chr8  | 120014347 | 3693 | -0.08 (-0.14, -0.02) | 0.011   | OPG     |
| rs10507496 | T | chr13 | 41207828  | 3732 | -0.08 (-0.15, -0.02) | 0.011   | RANKL   |
| rs1037254  | C | chr13 | 38218761  | 3762 | -0.06 (-0.11, -0.01) | 0.011   | RANKL   |
| rs4569113  | G | chr13 | 26215232  | 3776 | -0.06 (-0.10, -0.01) | 0.011   | RANKL   |
| rs1516116  | T | chr2  | 161508360 | 3795 | -0.06 (-0.10, -0.01) | 0.011   | TANK    |
| rs3733159  | A | chr3  | 187843103 | 3827 | -0.06 (-0.11, -0.01) | 0.011   | AHSG    |
| rs693633   | G | chr13 | 25598764  | 3850 | -0.14 (-0.26, -0.03) | 0.012   | RANKL   |
| rs9545074  | T | chr13 | 35171871  | 3885 | -0.06 (-0.11, -0.01) | 0.012   | RANKL   |
| rs628780   | G | chr13 | 25721979  | 3906 | -0.06 (-0.10, -0.01) | 0.012   | RANKL   |
| rs6066502  | T | chr20 | 45911998  | 4038 | -0.09 (-0.16, -0.02) | 0.012   | NCOA3   |
| rs6490694  | T | chr13 | 21559666  | 4061 | -0.07 (-0.12, -0.01) | 0.012   | RANKL   |
| rs9576606  | A | chr13 | 38208746  | 4079 | -0.11 (-0.20, -0.02) | 0.012   | RANKL   |
| rs2763028  | A | chr6  | 152573915 | 4153 | -0.07 (-0.13, -0.02) | 0.012   | ESR1    |
| rs12959396 | T | chr18 | 58190289  | 4165 | -0.06 (-0.10, -0.01) | 0.013   | RANK    |
| rs374225   | T | chr22 | 18409878  | 4187 | -0.06 (-0.10, -0.01) | 0.013   | COMT    |
| rs115063   | T | chr7  | 24144360  | 4210 | -0.06 (-0.10, -0.01) | 0.013   | NPY     |
| rs1722659  | A | chr2  | 161533247 | 4298 | -0.06 (-0.12, -0.01) | 0.013   | TANK    |
| rs2166019  | T | chr4  | 55053122  | 4306 | -0.06 (-0.10, -0.01) | 0.013   | KIT     |
| rs4917     | T | chr3  | 187820407 | 4308 | -0.06 (-0.10, -0.01) | 0.013   | AHSG    |
| rs3134036  | A | chr8  | 119891041 | 4318 | -0.05 (-0.10, -0.01) | 0.013   | OPG     |
| rs9510743  | T | chr13 | 22922344  | 4381 | -0.06 (-0.11, -0.01) | 0.013   | RANKL   |
| rs400288   | G | chr13 | 41759772  | 4410 | -0.06 (-0.11, -0.01) | 0.013   | RANKL   |
| rs43054    | G | chr7  | 94917358  | 4429 | -0.06 (-0.11, -0.01) | 0.013   | PON1    |
| rs1538225  | C | chr13 | 33725602  | 4450 | -0.07 (-0.13, -0.02) | 0.014   | RANKL   |
| rs854561   | T | chr7  | 94784953  | 4498 | -0.06 (-0.11, -0.01) | 0.014   | PON1    |
| rs2035979  | T | chr8  | 119941620 | 4608 | -0.06 (-0.10, -0.01) | 0.014   | OPG     |
| rs2073741  | G | chr22 | 18369890  | 4651 | -0.07 (-0.13, -0.01) | 0.014   | COMT    |
| rs3742303  | A | chr13 | 30119106  | 4687 | -0.17 (-0.30, -0.03) | 0.014   | RANKL   |
| rs43065    | T | chr7  | 94949227  | 4693 | -0.07 (-0.12, -0.01) | 0.014   | PON1    |
| rs7997603  | T | chr13 | 30847809  | 4741 | -0.11 (-0.20, -0.02) | 0.014   | RANKL   |
| rs3133585  | A | chr8  | 119906332 | 4777 | -0.05 (-0.10, -0.01) | 0.015   | OPG     |
| rs3826838  | G | chr19 | 53875096  | 4881 | -0.08 (-0.15, -0.02) | 0.015   | DBP     |
| rs7220711  | A | chr17 | 39145491  | 4942 | -0.06 (-0.10, -0.01) | 0.015   | SOST    |
| rs1639     | T | chr7  | 94881786  | 4950 | -0.07 (-0.13, -0.01) | 0.015   | PON1    |
| rs6942710  | T | chr7  | 16556831  | 4952 | -0.06 (-0.10, -0.01) | 0.015   | SOSTDC1 |

\* 200 kb in either direction of the gene was included in the analysis

## Supplementary Table 6B

### Ranking of Candidate genes in list of top 5000 SNPs associated with the hip BMD

| SNP        | Allele | Chr.  | Position<br>Build36 | rank | effect               | p        | Candidate gene(s)* |
|------------|--------|-------|---------------------|------|----------------------|----------|--------------------|
| rs7752591  | A      | chr6  | 151988761           | 2    | -0.10 (-0.14, -0.06) | 2.16E-06 | ESR1               |
| rs3020331  | C      | chr6  | 152050473           | 9    | -0.09 (-0.13, -0.05) | 8.15E-06 | ESR1               |
| rs1038304  | G      | chr6  | 151974868           | 14   | -0.09 (-0.13, -0.05) | 1.42E-05 | ESR1               |
| rs851982   | T      | chr6  | 152066678           | 15   | -0.09 (-0.13, -0.05) | 1.59E-05 | ESR1               |
| rs6900157  | C      | chr6  | 151995820           | 17   | -0.10 (-0.14, -0.05) | 1.63E-05 | ESR1               |
| rs6929137  | A      | chr6  | 151978370           | 18   | -0.10 (-0.14, -0.05) | 1.84E-05 | ESR1               |
| rs3018362  | A      | chr18 | 58233073            | 30   | -0.09 (-0.13, -0.05) | 4.25E-05 | RANK               |
| rs7751941  | A      | chr6  | 151988351           | 36   | -0.10 (-0.15, -0.05) | 5.98E-05 | ESR1               |
| rs7753676  | G      | chr6  | 151918508           | 46   | -0.09 (-0.13, -0.04) | 7.48E-05 | ESR1               |
| rs712219   | G      | chr6  | 152020132           | 53   | -0.08 (-0.13, -0.04) | 9.07E-05 | ESR1               |
| rs1107748  | T      | chr17 | 39129340            | 61   | -0.08 (-0.13, -0.04) | 0.00011  | SOST               |
| rs4870044  | T      | chr6  | 151943102           | 75   | -0.09 (-0.14, -0.04) | 0.00012  | ESR1               |
| rs9315903  | G      | chr13 | 41736604            | 88   | -0.13 (-0.19, -0.06) | 0.00015  | RANKL              |
| rs258799   | T      | chr5  | 142510153           | 108  | -0.08 (-0.12, -0.04) | 0.00019  | NR3C1              |
| rs9478223  | C      | chr6  | 151941931           | 111  | -0.13 (-0.20, -0.06) | 0.00020  | ESR1               |
| rs3734803  | A      | chr6  | 151911338           | 151  | -0.10 (-0.16, -0.05) | 0.00028  | ESR1               |
| rs9594759  | T      | chr13 | 41930593            | 163  | -0.08 (-0.12, -0.04) | 0.00031  | RANKL              |
| rs7220711  | A      | chr17 | 39145491            | 175  | -0.08 (-0.12, -0.04) | 0.00035  | SOST               |
| rs2504063  | A      | chr6  | 152132400           | 180  | -0.08 (-0.12, -0.03) | 0.00036  | ESR1               |
| rs8097062  | G      | chr18 | 58236020            | 184  | -0.08 (-0.12, -0.03) | 0.00037  | RANK               |
| rs4390539  | G      | chr15 | 48189160            | 192  | -0.09 (-0.14, -0.04) | 0.00039  | HDC                |
| rs851993   | T      | chr6  | 152047704           | 219  | -0.07 (-0.12, -0.03) | 0.00046  | ESR1               |
| rs9315908  | G      | chr13 | 41788109            | 222  | -0.11 (-0.17, -0.05) | 0.00047  | RANKL              |
| rs852003   | A      | chr6  | 152003895           | 234  | -0.07 (-0.12, -0.03) | 0.00049  | ESR1               |
| rs9315909  | A      | chr13 | 41799736            | 250  | -0.11 (-0.17, -0.05) | 0.00054  | RANKL              |
| rs1513670  | A      | chr17 | 39162857            | 252  | -0.08 (-0.12, -0.03) | 0.00054  | SOST               |
| rs9479055  | C      | chr6  | 151889660           | 287  | -0.07 (-0.12, -0.03) | 0.00065  | ESR1               |
| rs4793017  | A      | chr17 | 39136506            | 300  | -0.08 (-0.12, -0.03) | 0.00069  | SOST               |
| rs9547011  | C      | chr13 | 30377640            | 304  | -0.08 (-0.12, -0.03) | 0.0007   | RANKL              |
| rs4463269  | T      | chr6  | 151903921           | 343  | -0.08 (-0.13, -0.03) | 0.0008   | ESR1               |
| rs1159327  | G      | chr6  | 152089715           | 347  | -0.08 (-0.12, -0.03) | 0.0008   | ESR1               |
| rs1001854  | G      | chr13 | 31459356            | 351  | -0.07 (-0.12, -0.03) | 0.0008   | RANKL              |
| rs4869738  | T      | chr6  | 151933844           | 390  | -0.09 (-0.14, -0.04) | 0.0010   | ESR1               |
| rs1924097  | A      | chr13 | 42207550            | 438  | -0.07 (-0.12, -0.03) | 0.0011   | RANKL              |
| rs12549314 | C      | chr8  | 25516796            | 488  | -0.09 (-0.14, -0.03) | 0.0012   | GnRH               |
| rs10507507 | T      | chr13 | 41867646            | 532  | -0.09 (-0.14, -0.03) | 0.0013   | RANKL              |
| rs853165   | C      | chr5  | 142530444           | 545  | -0.07 (-0.11, -0.03) | 0.0014   | NR3C1              |
| rs12956925 | A      | chr18 | 58164620            | 551  | -0.09 (-0.15, -0.04) | 0.0014   | RANK               |
| rs2665833  | G      | chr17 | 59260578            | 679  | -0.07 (-0.11, -0.03) | 0.0017   | GH1                |
| rs9552503  | C      | chr13 | 21258110            | 701  | -0.07 (-0.11, -0.03) | 0.0018   | RANKL              |
| rs6933660  | A      | chr6  | 151845447           | 721  | -0.08 (-0.12, -0.03) | 0.0019   | ESR1               |
| rs7132324  | C      | chr12 | 46593576            | 722  | -0.07 (-0.11, -0.03) | 0.0019   | VDR                |
| rs4531631  | A      | chr13 | 42033131            | 731  | -0.08 (-0.13, -0.03) | 0.0019   | RANKL              |
| rs213599   | A      | chr13 | 30352611            | 754  | -0.07 (-0.11, -0.02) | 0.0020   | RANKL              |
| rs2040718  | T      | chr13 | 30366980            | 867  | -0.07 (-0.12, -0.03) | 0.0023   | RANKL              |
| rs7997427  | G      | chr13 | 41189130            | 892  | -0.09 (-0.15, -0.03) | 0.0024   | RANKL              |
| rs4760670  | G      | chr12 | 46605880            | 916  | -0.07 (-0.11, -0.02) | 0.0024   | VDR                |
| rs12479669 | A      | chr20 | 44341442            | 925  | -0.07 (-0.12, -0.03) | 0.0025   | CD40               |
| rs168312   | G      | chr13 | 42019760            | 961  | -0.08 (-0.13, -0.03) | 0.0026   | RANKL              |
| rs232581   | A      | chr2  | 38280657            | 990  | -0.07 (-0.12, -0.03) | 0.0026   | CYP1B1             |
| rs1999805  | C      | chr6  | 152110057           | 1062 | -0.06 (-0.11, -0.02) | 0.0028   | ESR1               |
| rs12489988 | G      | chr3  | 123206390           | 1073 | -0.11 (-0.18, -0.04) | 0.0028   | CASR               |
| rs3093662  | A      | chr6  | 31652168            | 1100 | -0.14 (-0.24, -0.05) | 0.0029   | TNF                |
| rs7319920  | A      | chr13 | 34765044            | 1115 | -0.08 (-0.13, -0.03) | 0.0029   | RANKL              |
| rs4941139  | T      | chr18 | 58313771            | 1132 | -0.06 (-0.11, -0.02) | 0.0030   | RANK               |
| rs4522364  | T      | chr15 | 48129516            | 1179 | -0.07 (-0.11, -0.02) | 0.0031   | HDC                |
| rs4941815  | C      | chr13 | 35207635            | 1202 | -0.06 (-0.11, -0.02) | 0.0031   | RANKL              |

|            |   |       |           |      |                      |        |         |
|------------|---|-------|-----------|------|----------------------|--------|---------|
| rs9837111  | C | chr3  | 69686775  | 1273 | -0.13 (-0.22, -0.04) | 0.0034 | MITF    |
| rs2225621  | T | chr13 | 22926215  | 1275 | -0.06 (-0.11, -0.02) | 0.0034 | RANKL   |
| rs2504070  | T | chr6  | 152126666 | 1278 | -0.07 (-0.11, -0.02) | 0.0034 | ESR1    |
| rs2290547  | G | chr3  | 47036187  | 1305 | -0.09 (-0.14, -0.03) | 0.0035 | PTHR1   |
| rs4898457  | G | chrX  | 152811550 | 1362 | -0.07 (-0.12, -0.02) | 0.0036 | IRAK1   |
| rs2160532  | G | chr12 | 15124762  | 1443 | -0.06 (-0.10, -0.02) | 0.0039 | MGP     |
| rs5031002  | A | chrX  | 66859350  | 1455 | -0.18 (-0.30, -0.06) | 0.0039 | AR      |
| rs7156     | T | chr7  | 16606140  | 1490 | -0.06 (-0.10, -0.02) | 0.0040 | SOSTDC1 |
| rs2853564  | C | chr12 | 46564754  | 1515 | -0.06 (-0.10, -0.02) | 0.0041 | VDR     |
| rs5945361  | A | chrX  | 152799594 | 1530 | -0.07 (-0.12, -0.02) | 0.0041 | IRAK1   |
| rs9898     | C | chr3  | 187873321 | 1573 | -0.07 (-0.11, -0.02) | 0.0042 | AHSG    |
| rs3848731  | G | chr20 | 44354555  | 1607 | -0.07 (-0.12, -0.02) | 0.0044 | CD40    |
| rs1547347  | G | chr13 | 39542540  | 1653 | -0.11 (-0.18, -0.03) | 0.0045 | RANKL   |
| rs9512755  | C | chr13 | 27056229  | 1715 | -0.09 (-0.15, -0.03) | 0.0047 | RANKL   |
| rs1639     | T | chr7  | 94881786  | 1731 | -0.08 (-0.13, -0.02) | 0.0047 | PON1    |
| rs213615   | G | chr13 | 30347156  | 1733 | -0.06 (-0.10, -0.02) | 0.0047 | RANKL   |
| rs11538677 | A | chr13 | 35100269  | 1879 | -0.09 (-0.16, -0.03) | 0.0052 | RANKL   |
| rs9324918  | G | chr5  | 142747353 | 1883 | -0.08 (-0.14, -0.02) | 0.0052 | NR3C1   |
| rs2584608  | G | chr17 | 59290442  | 1891 | -0.06 (-0.10, -0.02) | 0.0052 | GH1     |
| rs851995   | A | chr6  | 152047227 | 1909 | -0.06 (-0.10, -0.02) | 0.0053 | ESR1    |
| rs4670788  | C | chr2  | 37965730  | 1949 | -0.13 (-0.23, -0.04) | 0.0054 | CYP1B1  |
| rs258790   | A | chr5  | 142522170 | 2009 | -0.06 (-0.10, -0.02) | 0.0056 | NR3C1   |
| rs9544915  | T | chr13 | 35128485  | 2027 | -0.09 (-0.15, -0.03) | 0.0056 | RANKL   |
| rs1053275  | G | chr7  | 94839491  | 2088 | -0.06 (-0.10, -0.02) | 0.0059 | PON1    |
| rs68352    | C | chr2  | 38261470  | 2097 | -0.06 (-0.10, -0.02) | 0.0059 | CYP1B1  |
| rs4770748  | A | chr13 | 18557081  | 2107 | -0.12 (-0.20, -0.03) | 0.0059 | RANKL   |
| rs1886490  | A | chr13 | 25494562  | 2139 | -0.08 (-0.14, -0.02) | 0.0061 | RANKL   |
| rs4760648  | C | chr12 | 46566932  | 2172 | -0.06 (-0.10, -0.02) | 0.0061 | VDR     |
| rs4302546  | G | chr5  | 59558262  | 2176 | -0.07 (-0.12, -0.02) | 0.0061 | PDE4D   |
| rs258820   | G | chr5  | 142574714 | 2213 | -0.06 (-0.10, -0.02) | 0.0062 | NR3C1   |
| rs4870024  | C | chr6  | 151872462 | 2233 | -0.08 (-0.14, -0.02) | 0.0063 | ESR1    |
| rs1859121  | T | chr7  | 94814903  | 2395 | -0.06 (-0.10, -0.02) | 0.0067 | PON1    |
| rs9510743  | T | chr13 | 22922344  | 2426 | -0.06 (-0.11, -0.02) | 0.0068 | RANKL   |
| rs617753   | C | chr18 | 58336658  | 2447 | -0.07 (-0.12, -0.02) | 0.0068 | RANK    |
| rs6567287  | C | chr18 | 58345824  | 2495 | -0.07 (-0.12, -0.02) | 0.0070 | RANK    |
| rs3818314  | C | chr13 | 20965681  | 2500 | -0.08 (-0.14, -0.02) | 0.0070 | RANKL   |
| rs7904252  | G | chr10 | 104446715 | 2526 | -0.06 (-0.11, -0.02) | 0.0071 | CYP17   |
| rs978903   | A | chr7  | 94842103  | 2653 | -0.06 (-0.10, -0.02) | 0.0075 | PON1    |
| rs1340874  | A | chr6  | 151962465 | 2689 | -0.07 (-0.13, -0.02) | 0.0077 | ESR1    |
| rs846489   | A | chr13 | 29740355  | 2737 | -0.10 (-0.18, -0.03) | 0.0078 | RANKL   |
| rs3890733  | T | chr12 | 46575640  | 2747 | -0.06 (-0.10, -0.02) | 0.0078 | VDR     |
| rs11208756 | C | chr1  | 66041899  | 2775 | -0.13 (-0.22, -0.03) | 0.0079 | LEPR    |
| rs6469792  | C | chr8  | 120077552 | 2797 | -0.06 (-0.10, -0.01) | 0.0079 | OPG     |
| rs9566949  | C | chr13 | 31463539  | 2802 | -0.06 (-0.11, -0.02) | 0.0080 | RANKL   |
| rs2957128  | A | chr18 | 58211715  | 2818 | -0.06 (-0.10, -0.01) | 0.0080 | RANK    |
| rs7168944  | C | chr15 | 48192536  | 2845 | -0.06 (-0.11, -0.02) | 0.0080 | HDC     |
| rs10493387 | C | chr1  | 65994521  | 2851 | -0.09 (-0.16, -0.02) | 0.0081 | LEPR    |
| rs4428857  | G | chr1  | 65996109  | 2863 | -0.09 (-0.16, -0.02) | 0.0081 | LEPR    |
| rs7999869  | C | chr13 | 33160060  | 2963 | -0.06 (-0.10, -0.02) | 0.0085 | RANKL   |
| rs4341514  | C | chr11 | 2098179   | 2968 | -0.06 (-0.10, -0.01) | 0.0085 | IGF2    |
| rs3917498  | C | chr7  | 94784191  | 3036 | -0.06 (-0.10, -0.02) | 0.0087 | PON1    |
| rs2261     | G | chr2  | 38283267  | 3154 | -0.05 (-0.10, -0.01) | 0.0091 | CYP1B1  |
| rs1002036  | C | chr13 | 30405727  | 3181 | -0.07 (-0.12, -0.02) | 0.0092 | RANKL   |
| rs151474   | T | chr13 | 41806680  | 3223 | -0.06 (-0.10, -0.01) | 0.0094 | RANKL   |
| rs482983   | C | chr13 | 29593606  | 3340 | -0.06 (-0.10, -0.01) | 0.0097 | RANKL   |
| rs13090187 | C | chr3  | 69790275  | 3393 | -0.06 (-0.10, -0.01) | 0.0099 | MITF    |
| rs12416759 | A | chr11 | 14893519  | 3399 | -0.10 (-0.17, -0.02) | 0.0099 | CALCA   |
| rs10405617 | A | chr19 | 10613968  | 3412 | -0.06 (-0.11, -0.01) | 0.0100 | PDE4A   |
| rs9315391  | C | chr13 | 35629309  | 3423 | -0.07 (-0.12, -0.02) | 0.0100 | RANKL   |
| rs7316953  | C | chr13 | 41915470  | 3492 | -0.07 (-0.12, -0.02) | 0.010  | RANKL   |
| rs6490797  | A | chr13 | 22958289  | 3547 | -0.07 (-0.12, -0.02) | 0.010  | RANKL   |
| rs6032754  | C | chr20 | 44352166  | 3601 | -0.06 (-0.10, -0.01) | 0.011  | CD40    |

|            |   |       |           |      |                      |       |        |
|------------|---|-------|-----------|------|----------------------|-------|--------|
| rs846491   | C | chr13 | 29743131  | 3718 | -0.09 (-0.16, -0.02) | 0.011 | RANKL  |
| rs10498514 | C | chr14 | 63968808  | 3731 | -0.17 (-0.30, -0.04) | 0.011 | ESR2   |
| rs9533215  | A | chr13 | 42185262  | 3782 | -0.05 (-0.10, -0.01) | 0.011 | RANKL  |
| rs1328650  | C | chr13 | 35610330  | 3809 | -0.06 (-0.11, -0.01) | 0.011 | RANKL  |
| rs12055945 | C | chr7  | 22778849  | 3961 | -0.06 (-0.11, -0.01) | 0.012 | IL6    |
| rs232574   | T | chr2  | 38240731  | 3984 | -0.06 (-0.10, -0.01) | 0.012 | CYP1B1 |
| rs1325788  | T | chr13 | 20937671  | 3987 | -0.07 (-0.12, -0.01) | 0.012 | RANKL  |
| rs6219     | A | chr12 | 101314322 | 3990 | -0.09 (-0.16, -0.02) | 0.012 | IGF1   |
| rs2269368  | C | chrX  | 152843013 | 4040 | -0.09 (-0.16, -0.02) | 0.012 | IRAK1  |
| rs980281   | T | chr6  | 152039956 | 4048 | -0.05 (-0.09, -0.01) | 0.012 | ESR1   |
| rs9965948  | T | chr18 | 58352844  | 4049 | -0.05 (-0.10, -0.01) | 0.012 | RANK   |
| rs9397066  | A | chr6  | 151961629 | 4093 | -0.06 (-0.11, -0.01) | 0.012 | ESR1   |
| rs1555587  | T | chr13 | 42189413  | 4128 | -0.06 (-0.11, -0.01) | 0.012 | RANKL  |
| rs9285265  | G | chr13 | 22990744  | 4142 | -0.05 (-0.10, -0.01) | 0.012 | RANKL  |
| rs2963154  | C | chr5  | 142722730 | 4145 | -0.07 (-0.13, -0.02) | 0.012 | NR3C1  |
| rs121046   | G | chr13 | 31467815  | 4175 | -0.05 (-0.10, -0.01) | 0.012 | RANKL  |
| rs9576756  | T | chr13 | 38677744  | 4187 | -0.06 (-0.11, -0.01) | 0.012 | RANKL  |
| rs12864419 | C | chr13 | 28053904  | 4227 | -0.05 (-0.10, -0.01) | 0.013 | RANKL  |
| rs7997858  | G | chr13 | 28070709  | 4238 | -0.06 (-0.10, -0.01) | 0.013 | RANKL  |
| rs11617228 | C | chr13 | 22753056  | 4267 | -0.06 (-0.11, -0.01) | 0.013 | RANKL  |
| rs4355801  | A | chr8  | 119993054 | 4278 | -0.05 (-0.09, -0.01) | 0.013 | OPG    |
| rs7337921  | A | chr13 | 23381053  | 4293 | -0.05 (-0.10, -0.01) | 0.013 | RANKL  |
| rs2504065  | G | chr6  | 152136860 | 4310 | -0.05 (-0.09, -0.01) | 0.013 | ESR1   |
| rs43054    | G | chr7  | 94917358  | 4321 | -0.06 (-0.10, -0.01) | 0.013 | PON1   |
| rs3942629  | T | chr3  | 123206728 | 4342 | -0.06 (-0.11, -0.01) | 0.013 | CASR   |
| rs1777670  | A | chr13 | 35052966  | 4343 | -0.07 (-0.12, -0.01) | 0.013 | RANKL  |
| rs2107622  | T | chr5  | 142531590 | 4400 | -0.08 (-0.15, -0.02) | 0.013 | NR3C1  |
| rs7992970  | A | chr13 | 41843463  | 4460 | -0.06 (-0.11, -0.01) | 0.013 | RANKL  |
| rs1889926  | T | chr1  | 65470767  | 4493 | -0.06 (-0.10, -0.01) | 0.013 | LEPR   |
| rs8070464  | G | chr17 | 4459241   | 4508 | -0.07 (-0.13, -0.02) | 0.014 | ALOX15 |
| rs3785568  | G | chr17 | 59377523  | 4540 | -0.07 (-0.12, -0.01) | 0.014 | GH1    |
| rs2235638  | G | chr16 | 1513891   | 4630 | -0.14 (-0.24, -0.03) | 0.014 | CLCN7  |
| rs9315776  | C | chr13 | 39901022  | 4644 | -0.05 (-0.10, -0.01) | 0.014 | RANKL  |
| rs10183112 | A | chr2  | 38299283  | 4676 | -0.10 (-0.17, -0.02) | 0.014 | CYP1B1 |
| rs7337322  | A | chr13 | 37475056  | 4700 | -0.08 (-0.14, -0.02) | 0.014 | RANKL  |
| rs586205   | T | chr13 | 21263974  | 4745 | -0.08 (-0.15, -0.02) | 0.014 | RANKL  |
| rs4516035  | C | chr12 | 46586093  | 4845 | -0.05 (-0.09, -0.01) | 0.015 | VDR    |
| rs10219883 | C | chr13 | 31606478  | 4924 | -0.06 (-0.11, -0.01) | 0.015 | RANKL  |
| rs12165104 | G | chr18 | 58201621  | 4995 | -0.06 (-0.10, -0.01) | 0.015 | RANK   |

\* 200 kb in either direction of the gene was included in the analysis

## Appendix Figure 1

Schematic views of the BMD associated regions on 13q14, 8q24, 18q21, 6q25, 1p36, 6p21, 12q13 and 2p16.

Base pair positions are NCBI Build 36 coordinates. SNP names marked in green are SNPs tested in the region displayed, SNPs in red are the ones that replicated significantly ( $P$ -combined  $\leq 0.05$ ) and SNPs in blue were genome-wide significant ( $P < 1.7 \times 10^{-7}$ ). Displayed schematically below the SNP names are known protein-coding genes from the NCBI mRNA reference sequences collection (RefSeq). LD plot figure, at the bottom, includes pair-wise  $r^2$  values for common SNPs in the region (with MAF > 5%) from the HapMap Phase II release 22 (unphased genotypes) for the CEU population. Tracks shown are from the UCSC browser (Genome Res. 12(6), 996-1006, 2002).

### A. Region 13q14: 41,705,000-42,190,738 Mb (485 kb)

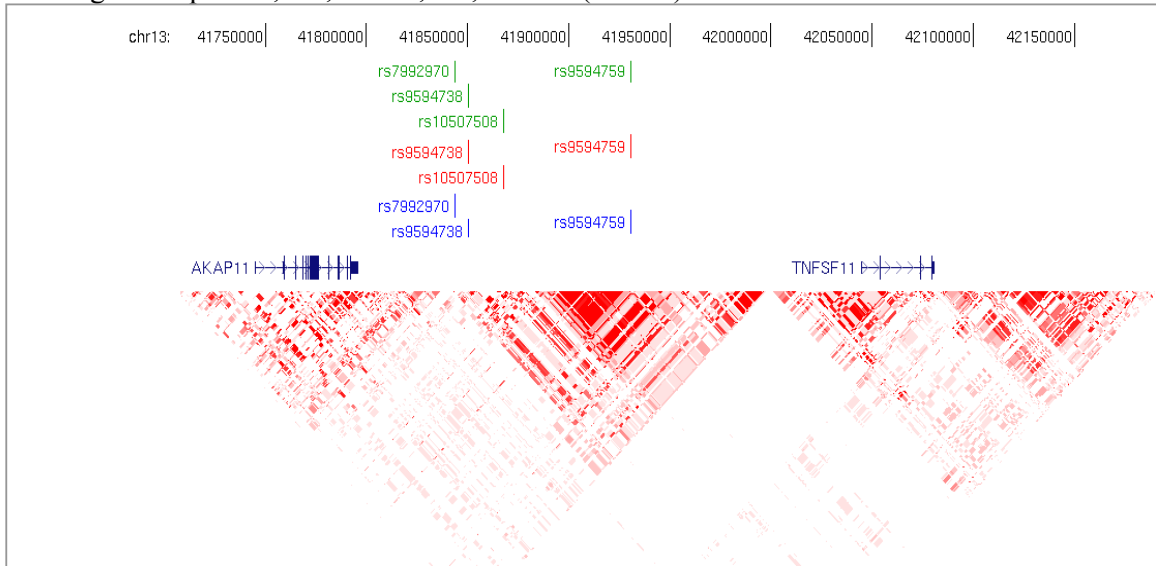

AKAP11 (A-kinase anchor protein 11), TNFSF11 (tumor necrosis factor ligand superfamily member 11)

### B. Region 8q24: 119,933,687-120,218,846 Mb (280 kb)

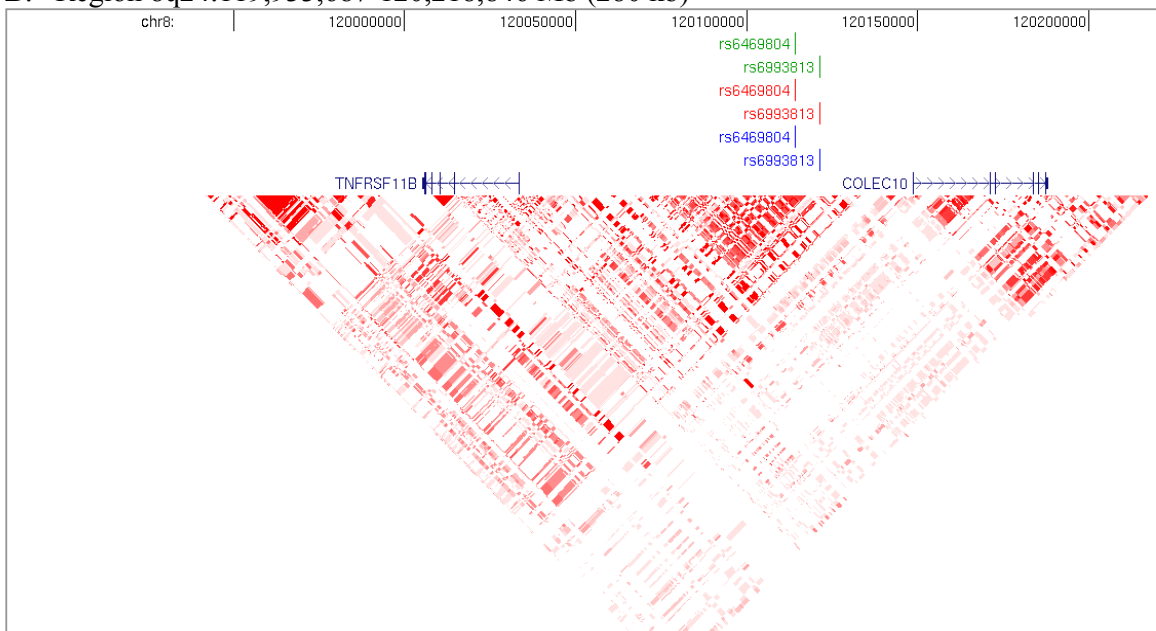

TNFRSF11B (tumor necrosis factor receptor superfamily, member 11) = RANKL (receptor activator of nuclear factor  $\kappa$ B ligand), COLEC10 (collectin sub-family member 10)

**C. Region 18q21: 58,130,000-58,299,627 Mb (169 kb)**

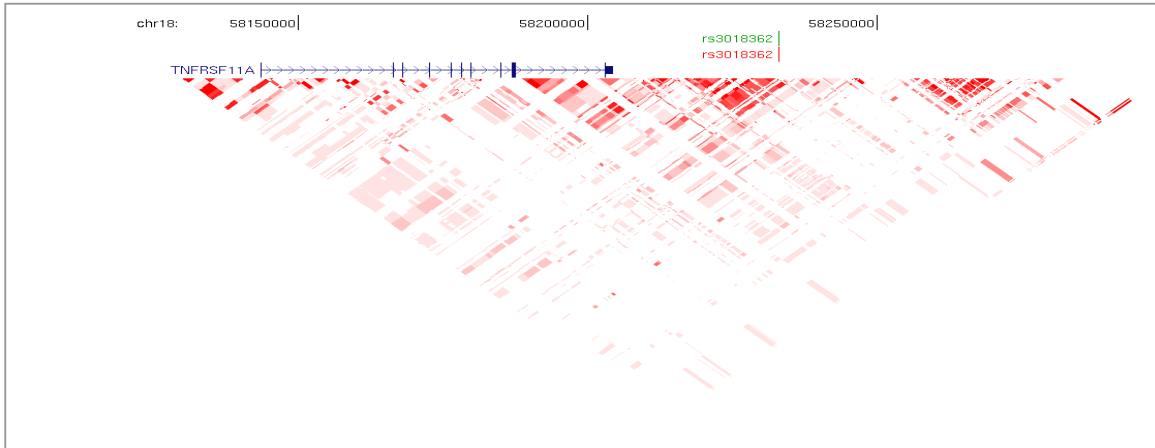

TNFRSF11A (Tumor necrosis factor receptor superfamily, member 11A) = RANK (receptor activator of nuclear factor  $\kappa$ B)

**D. Region 6q25: 151,840,000-152,470,000 Mb (630 kb)**

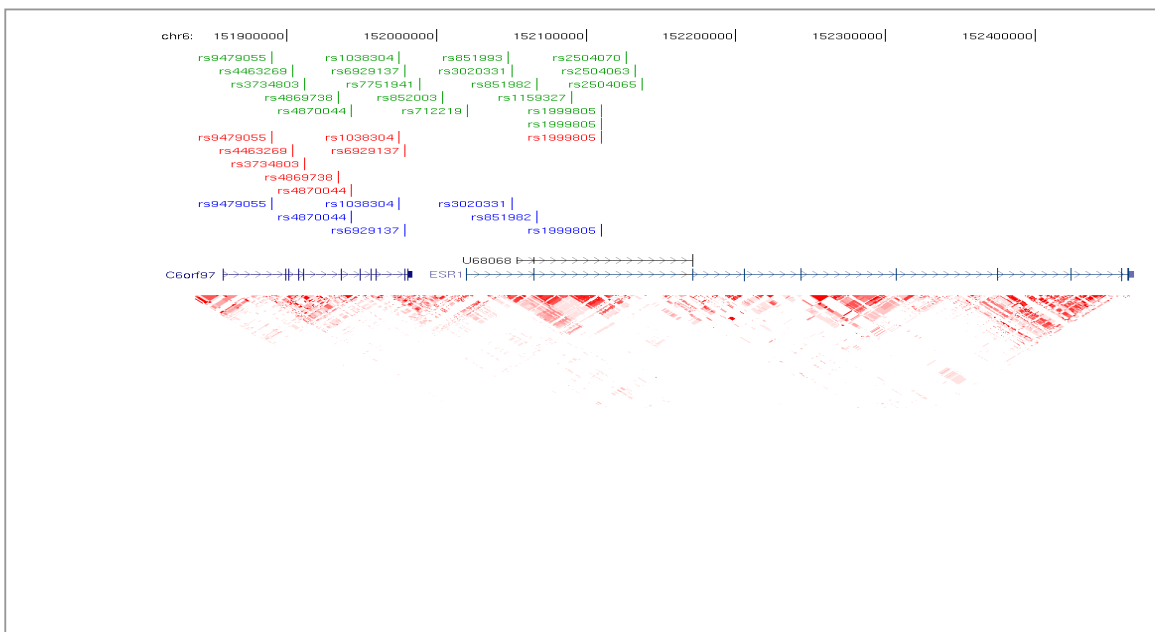

C6orf96 (chromosome 6 open reading frame 97), ESR1 (estrogen receptor 1)

**E. Region 1p36: 22,310,000-22,750,000 Mb (440 kb)**

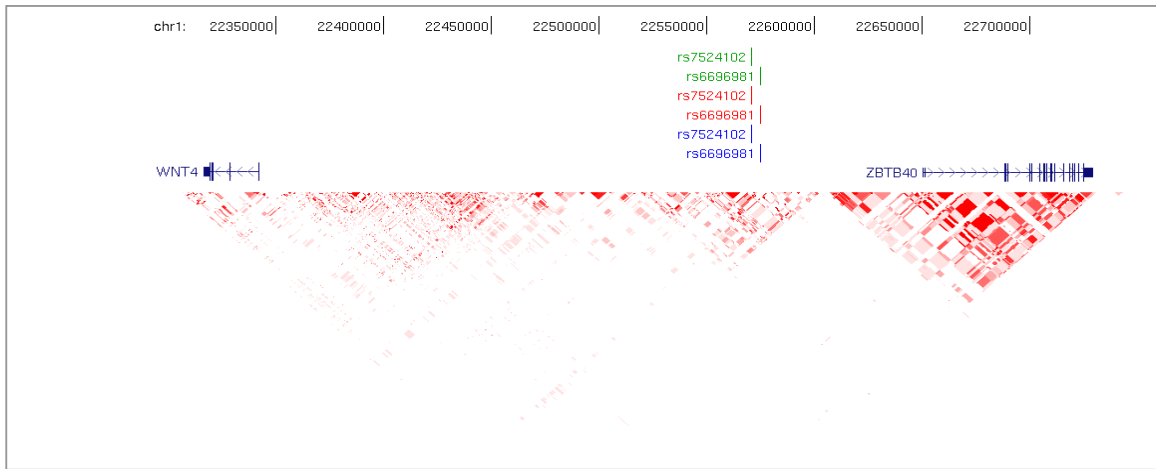

WNT4 (wingless-type MMTV integration site family member 4), ZBTB40 (zinc finger and BTB domain containing 40)

**F. Region 6p21:32,000,000-32,580,000 Mb (580 kb)**

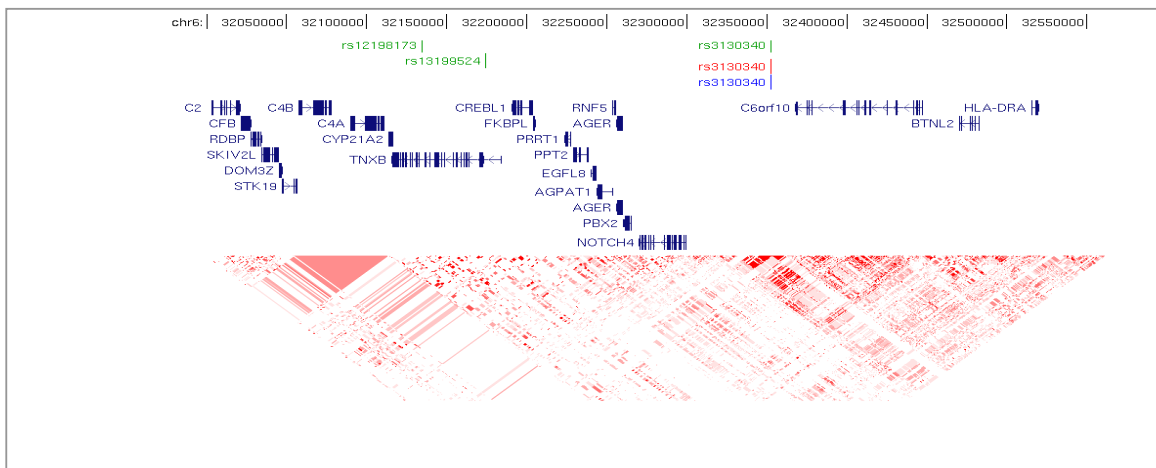

Notch4 (Notch homolog 4), C6orf10 (chromosome 6 open reading frame 10), TNXB (tenascin XB)



I. Region 12q13: 52,002,900-52,024,982 Mb (22 kb)

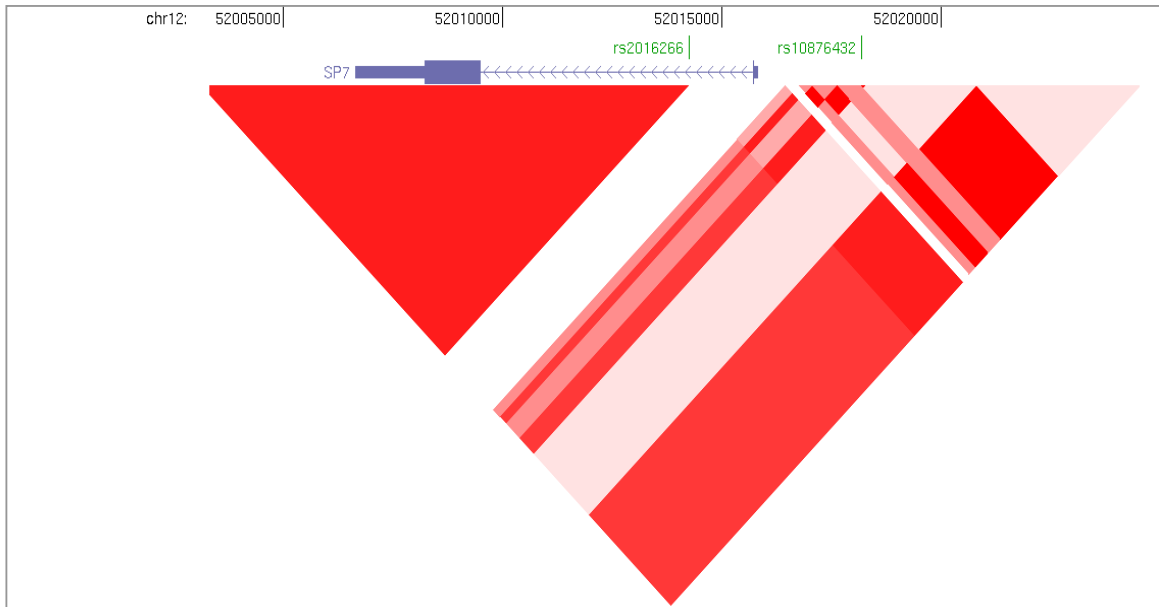

SP7 (transcription factor specificity protein 7) = osx (osterix)
